# Supplementary material for: In silicostudy of natural compounds from sesame against COVID-19 by targeting Mpro, PLproand RdRp
Source: Royal Society of Chemistry journal article supplement (doi:10.1039/d1ra03937g), 2021-01-01
Supplement: d1ra03937g1.pdf [file d1ra03937g1.pdf]

**Fig. S 1;  $^1\text{H}$  NMR spectrum of compound 1**

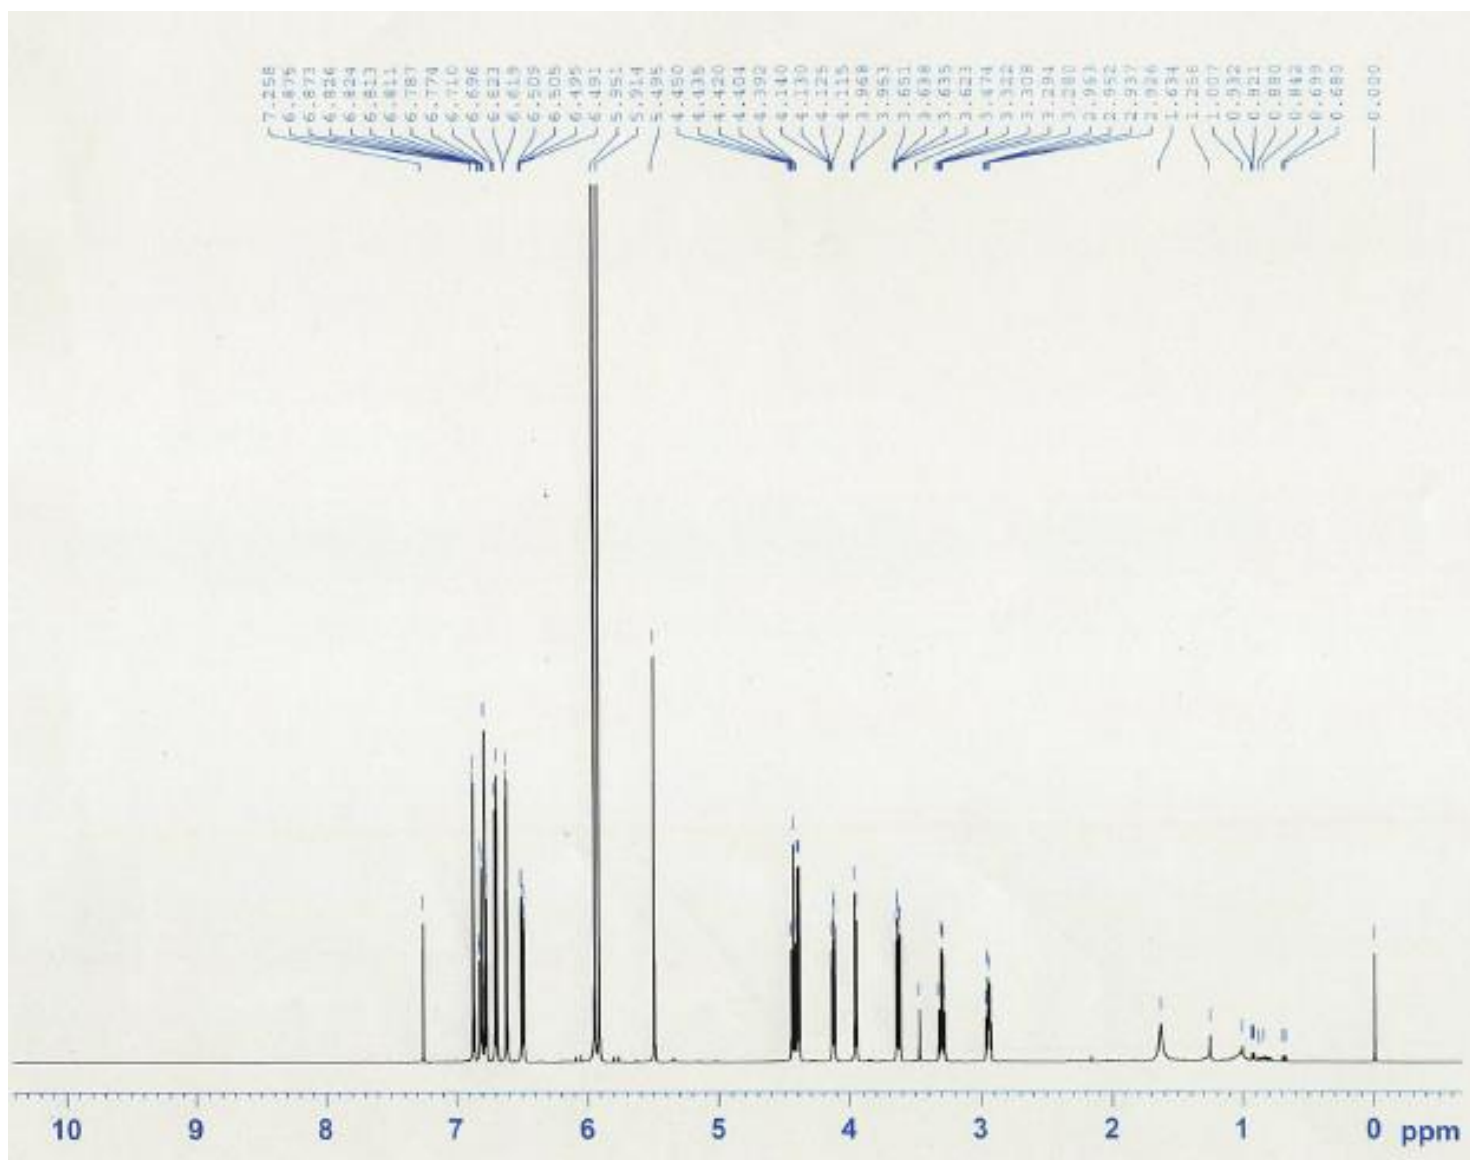

**Fig. S 2;**  $^{13}\text{C}$  NMR spectrum of compound **1**

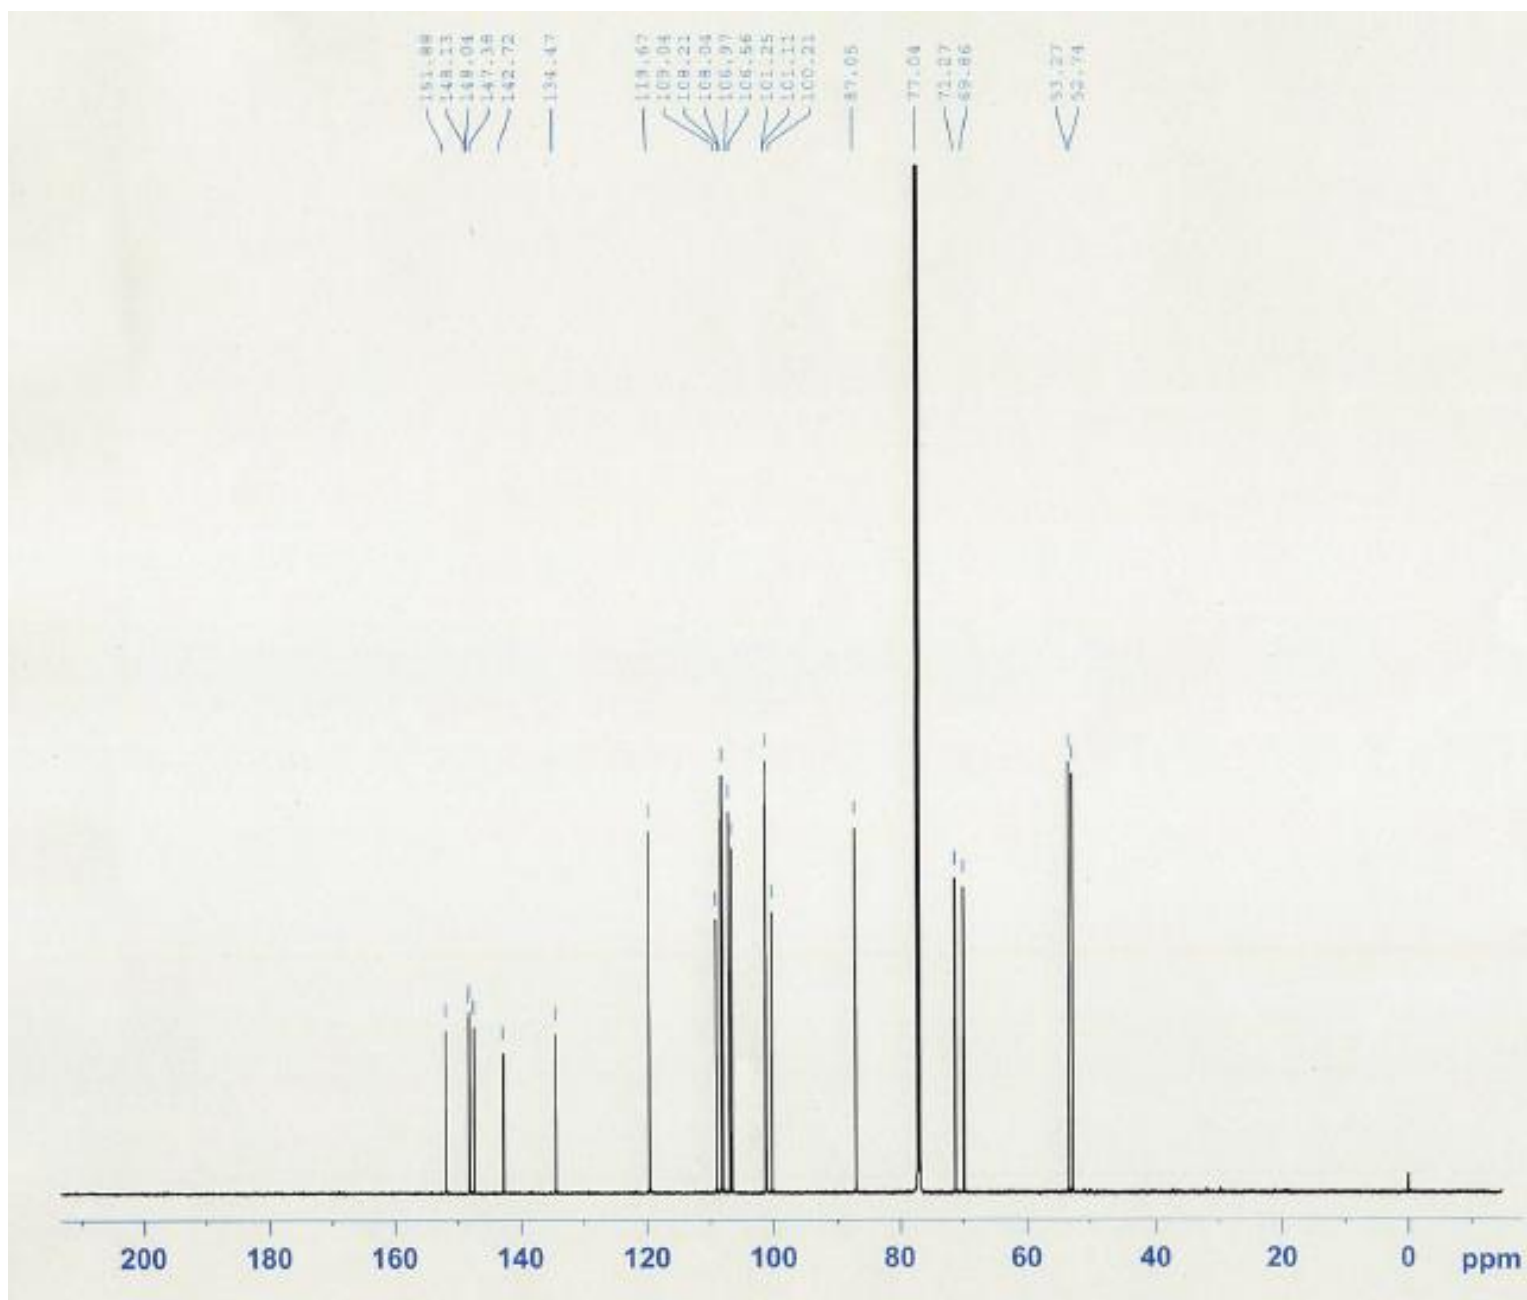

**Fig. S 3; HSQC spectrum of compound 1**

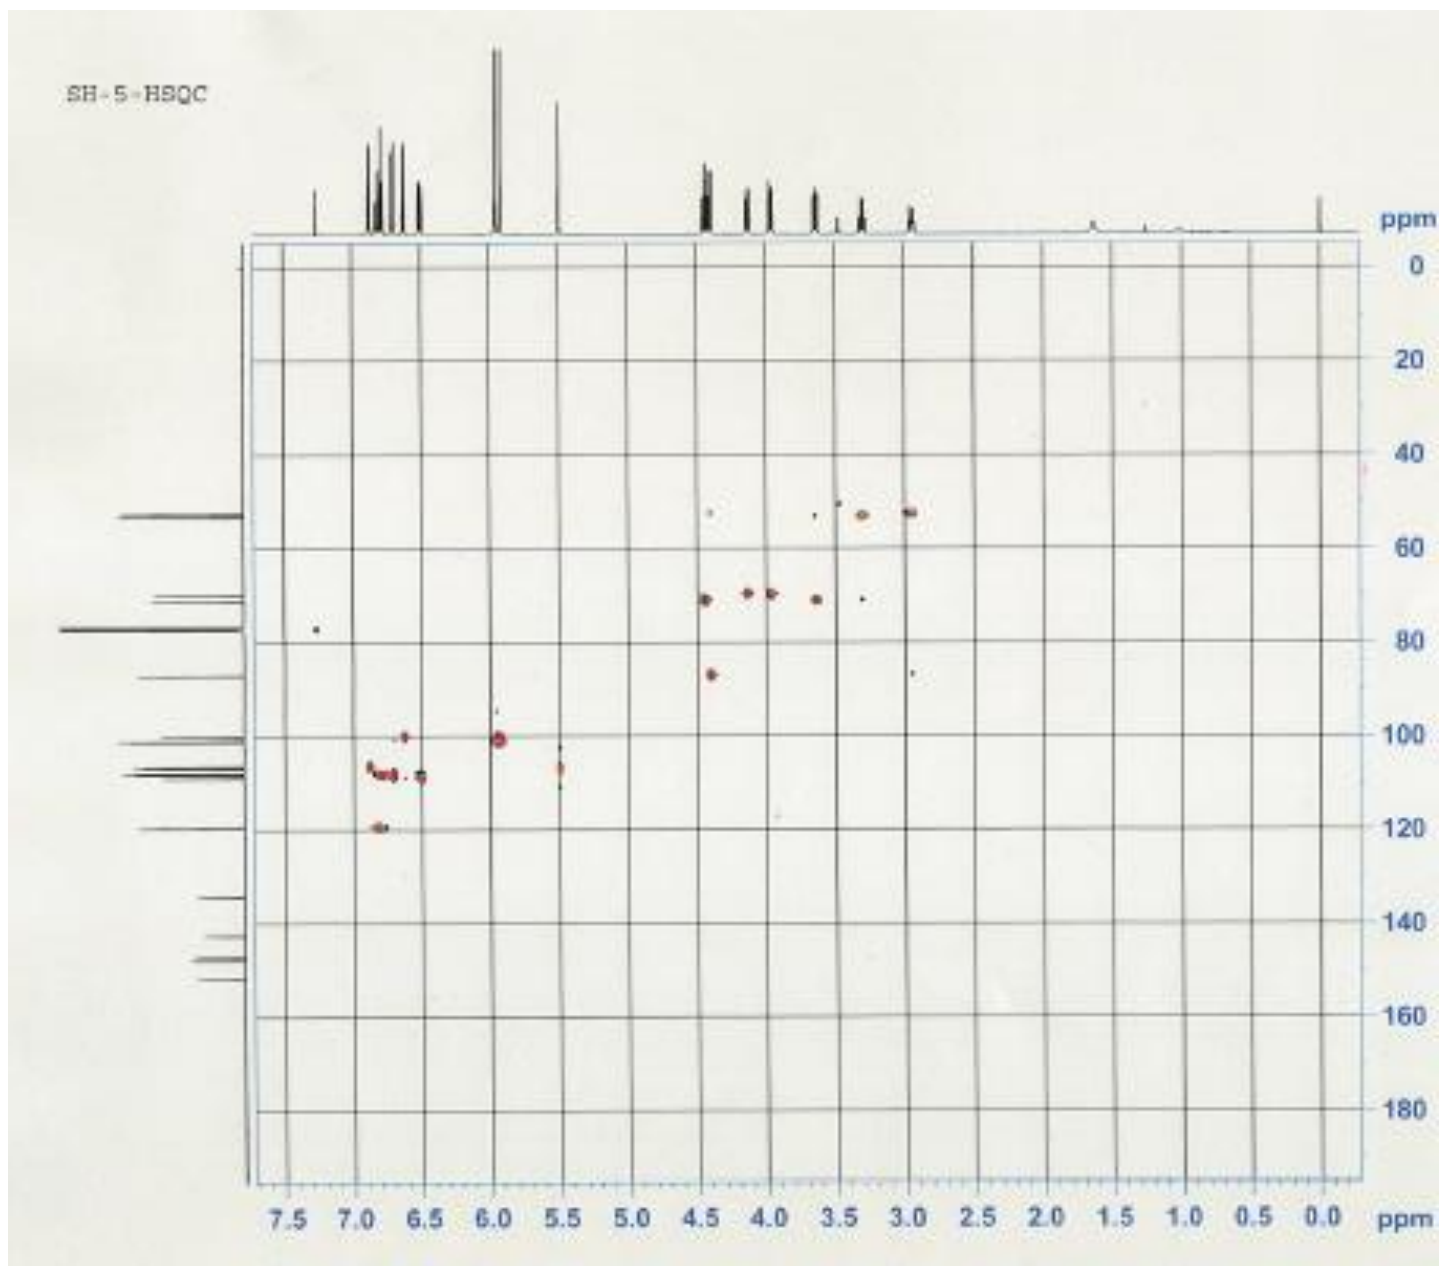

Fig. S 4; HMBC spectrum of compound 1

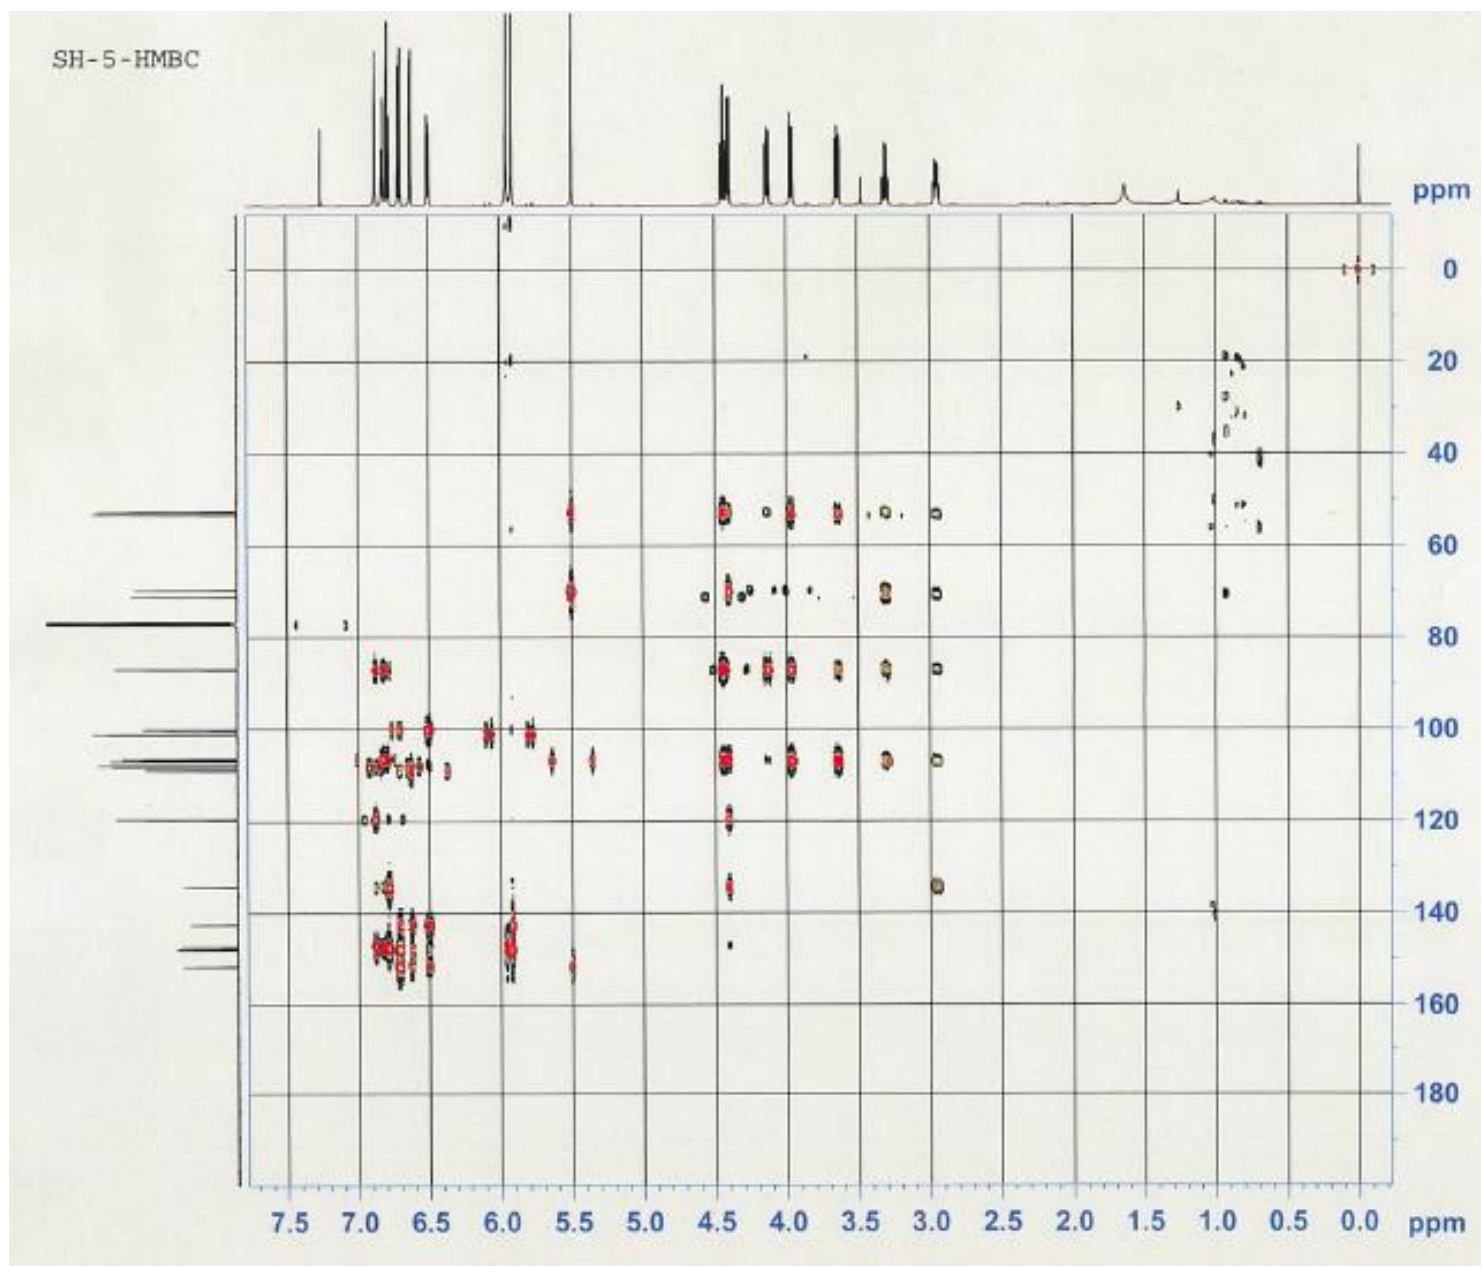

Fig. S 5;  $^1\text{H}$  NMR spectrum of compound 2

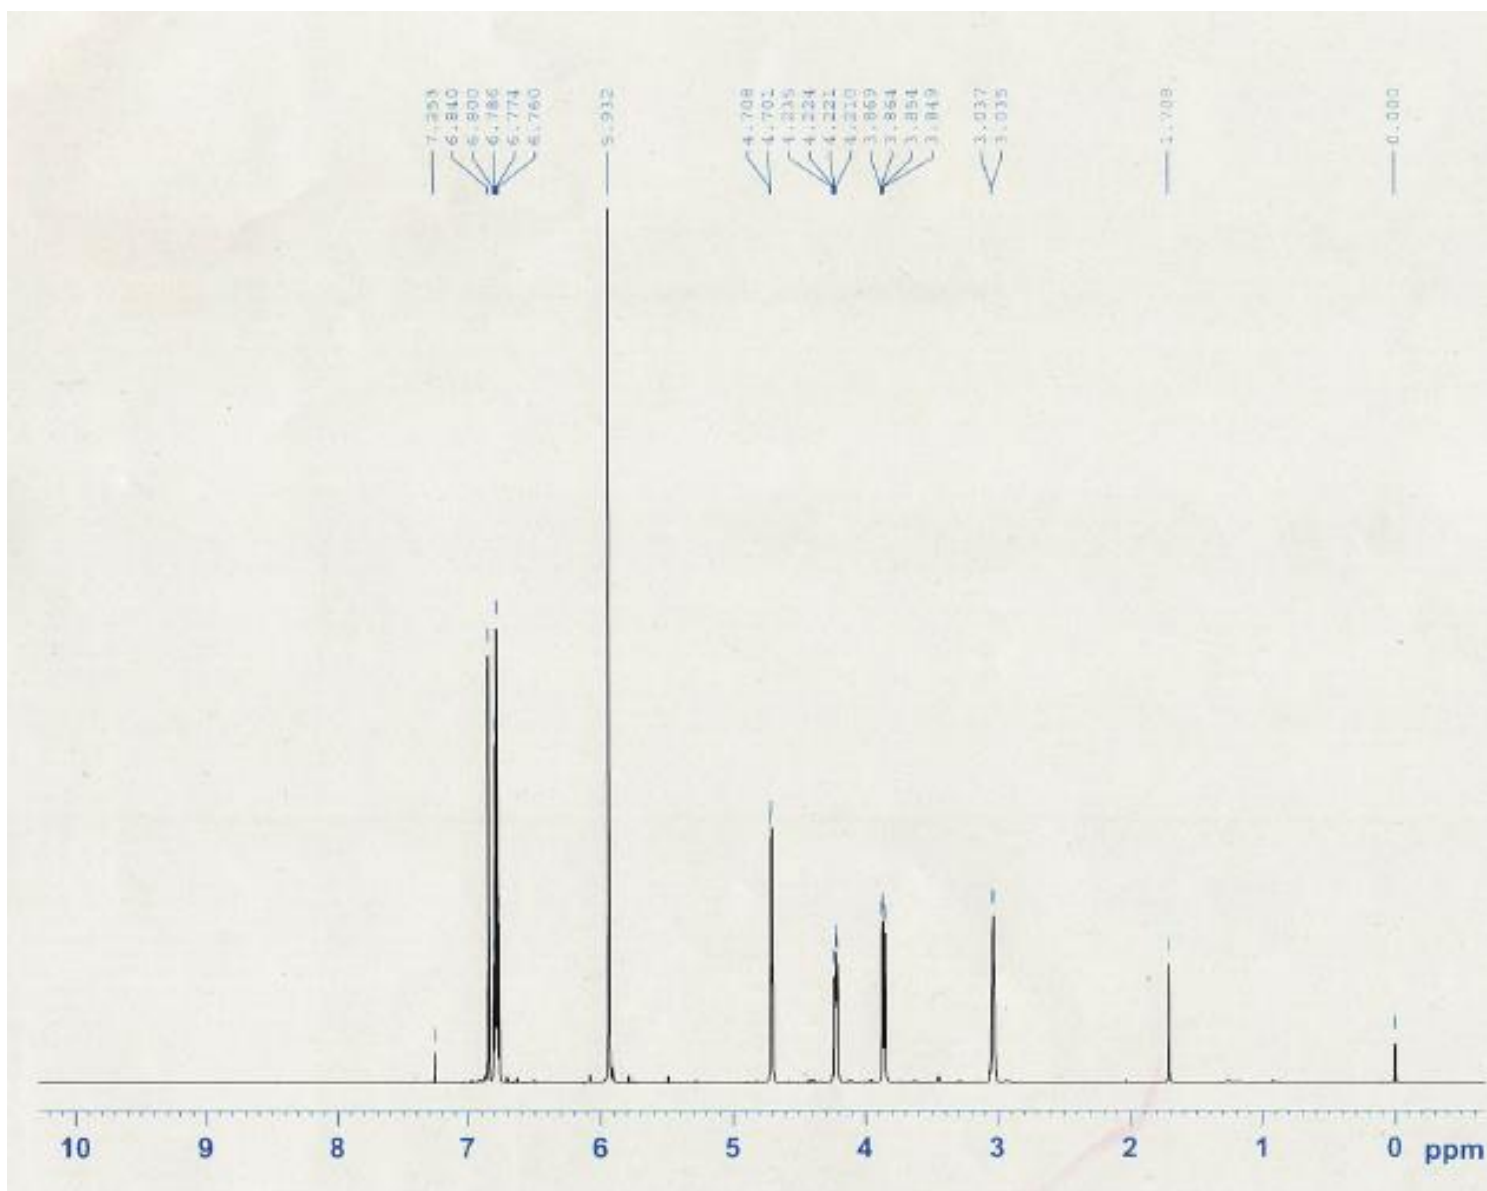

**Fig. S 6;  $^{13}\text{C}$  NMR spectrum of compound 2**

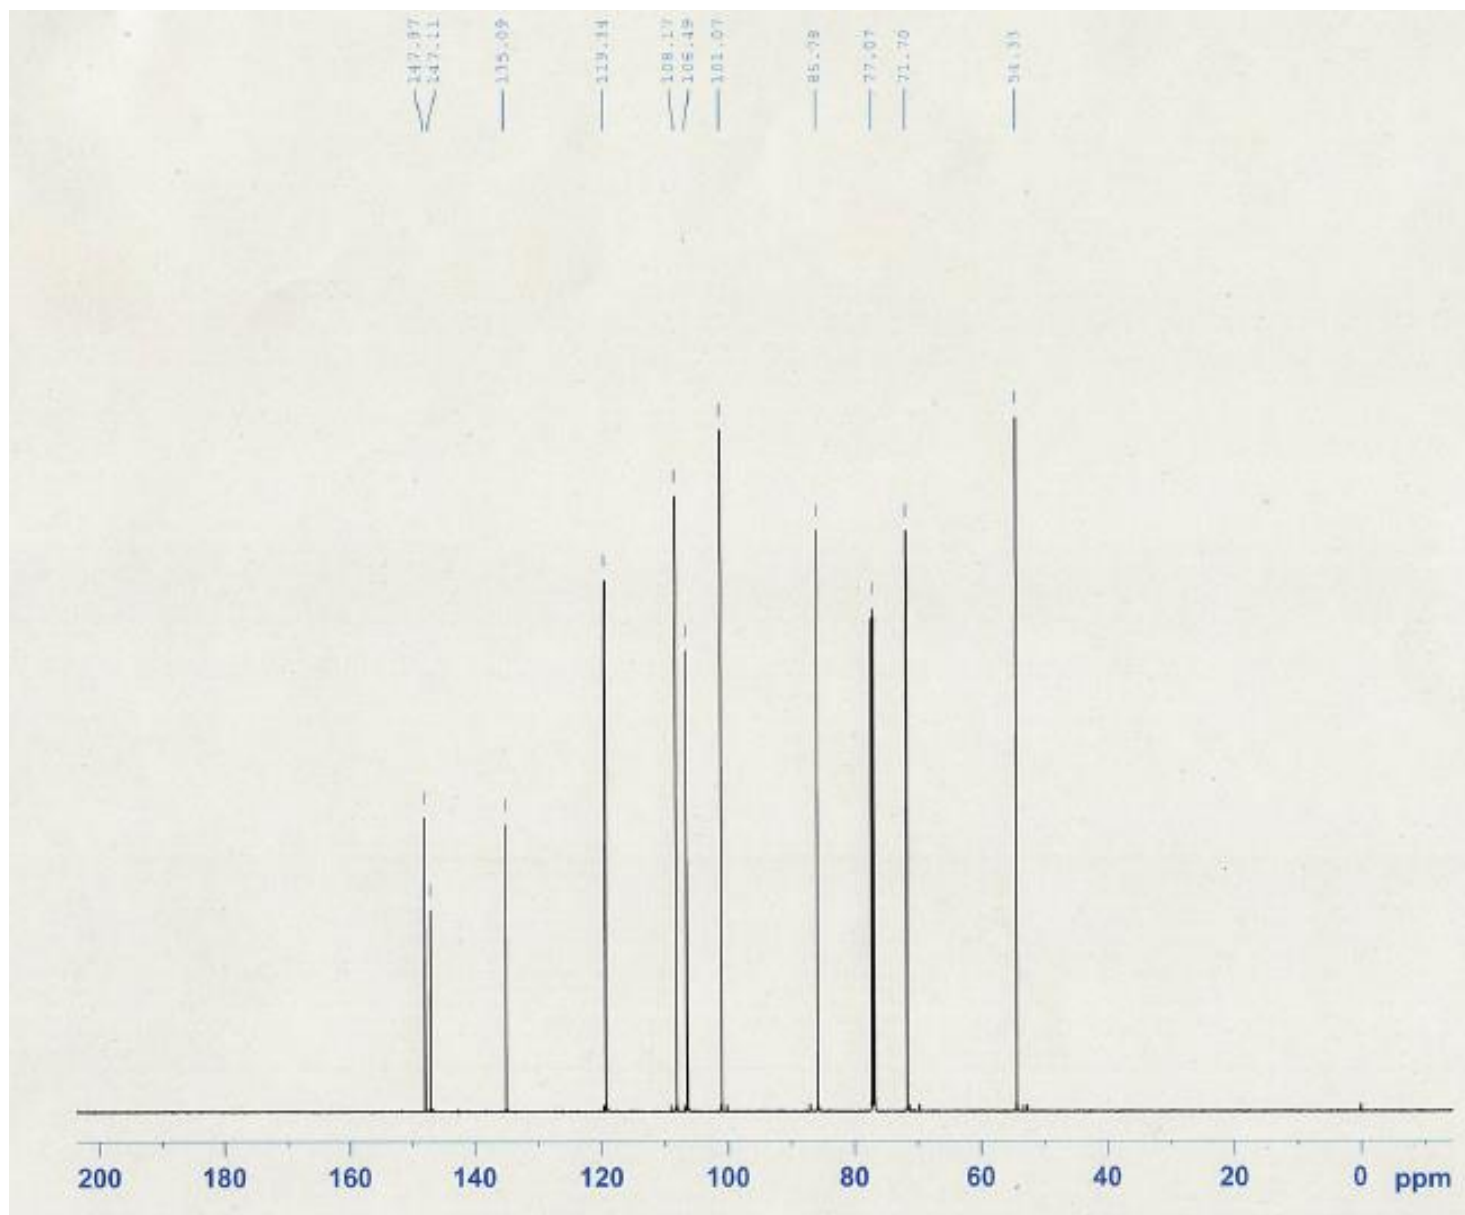

Fig. S 7; HSQC spectrum of compound 2

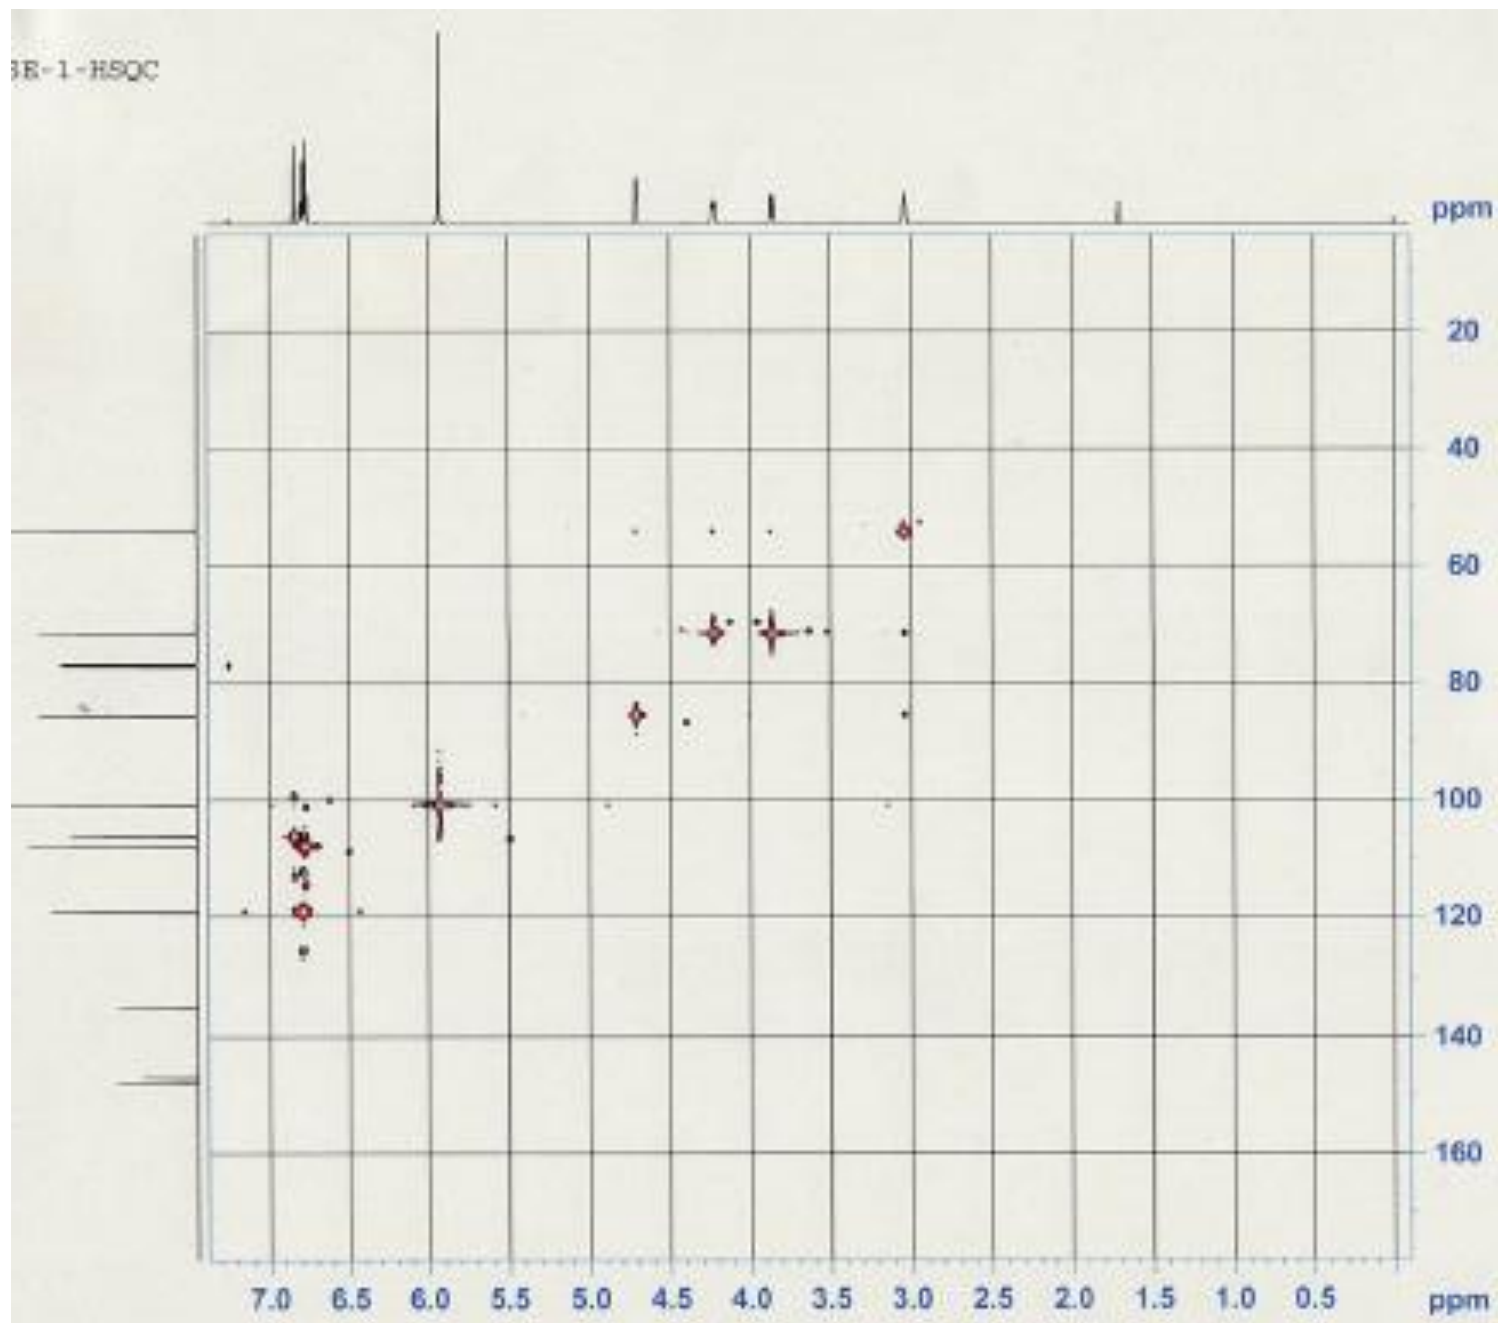

Fig. S 8; HMBC spectrum of compound 2

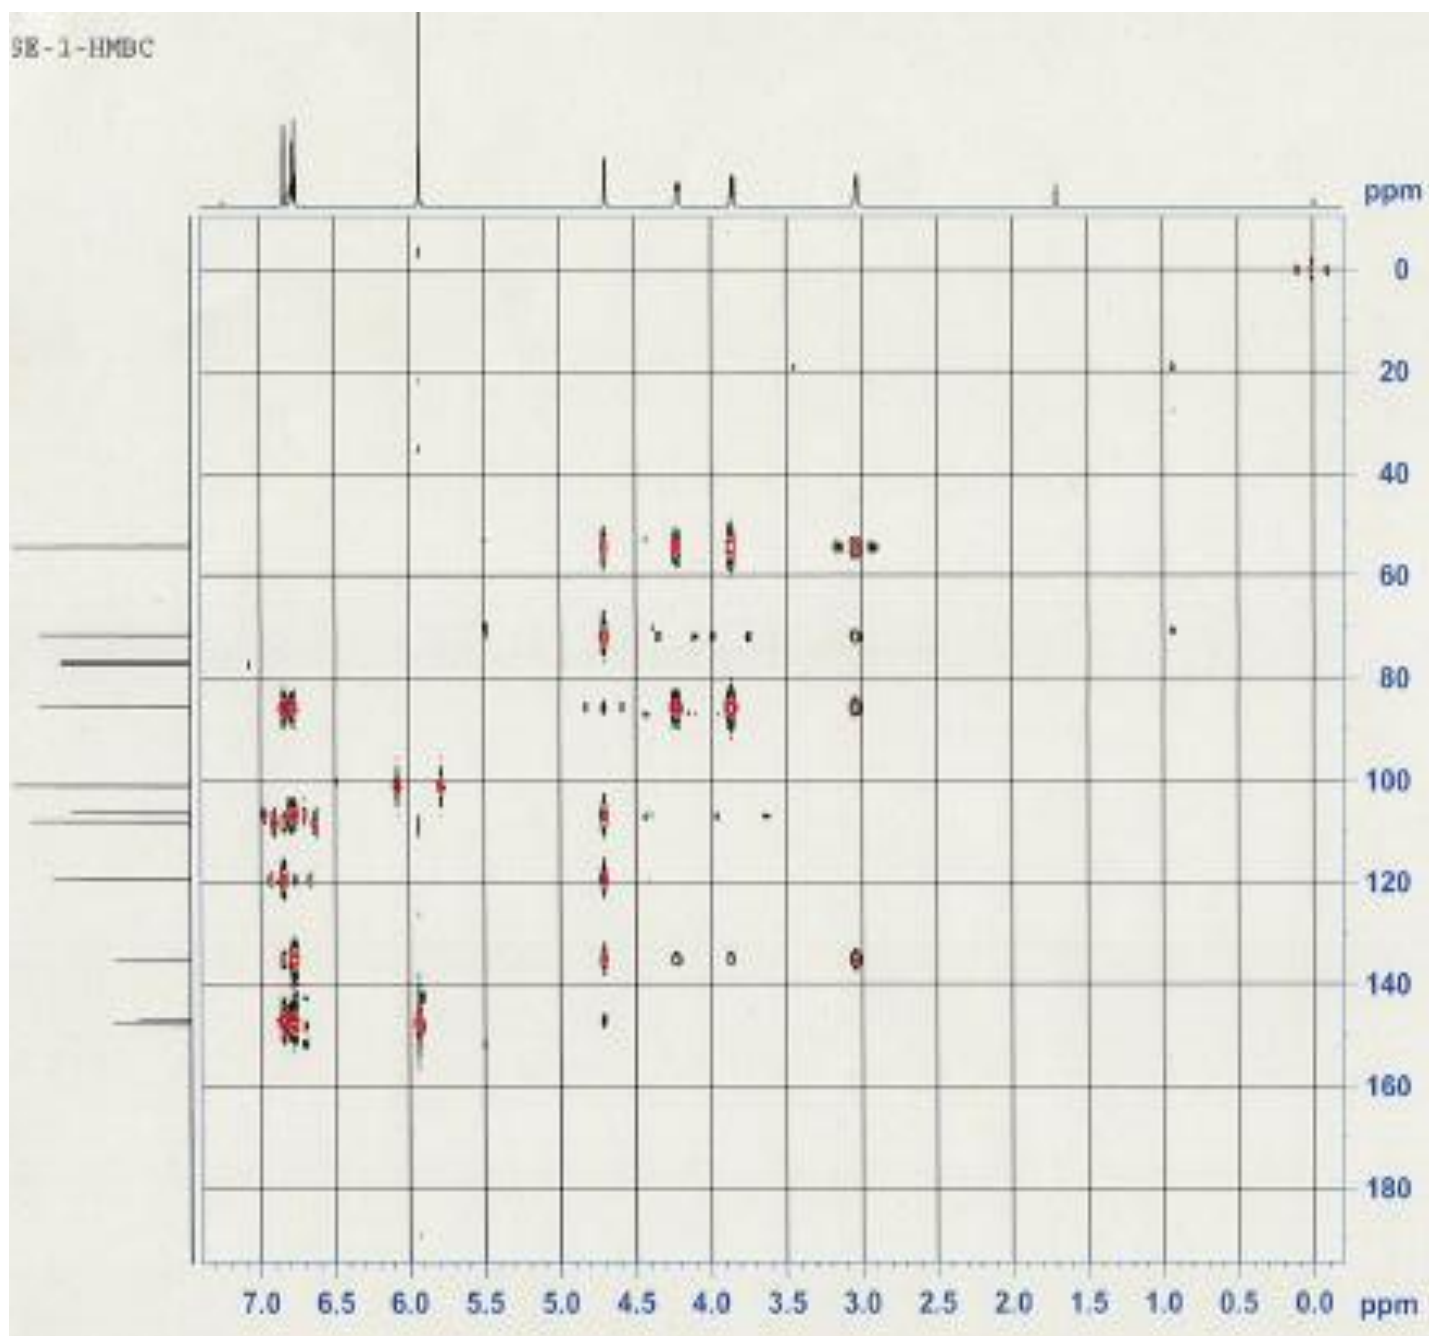



**Fig. S 9;  $^1\text{H}$  NMR spectrum of compound 3**

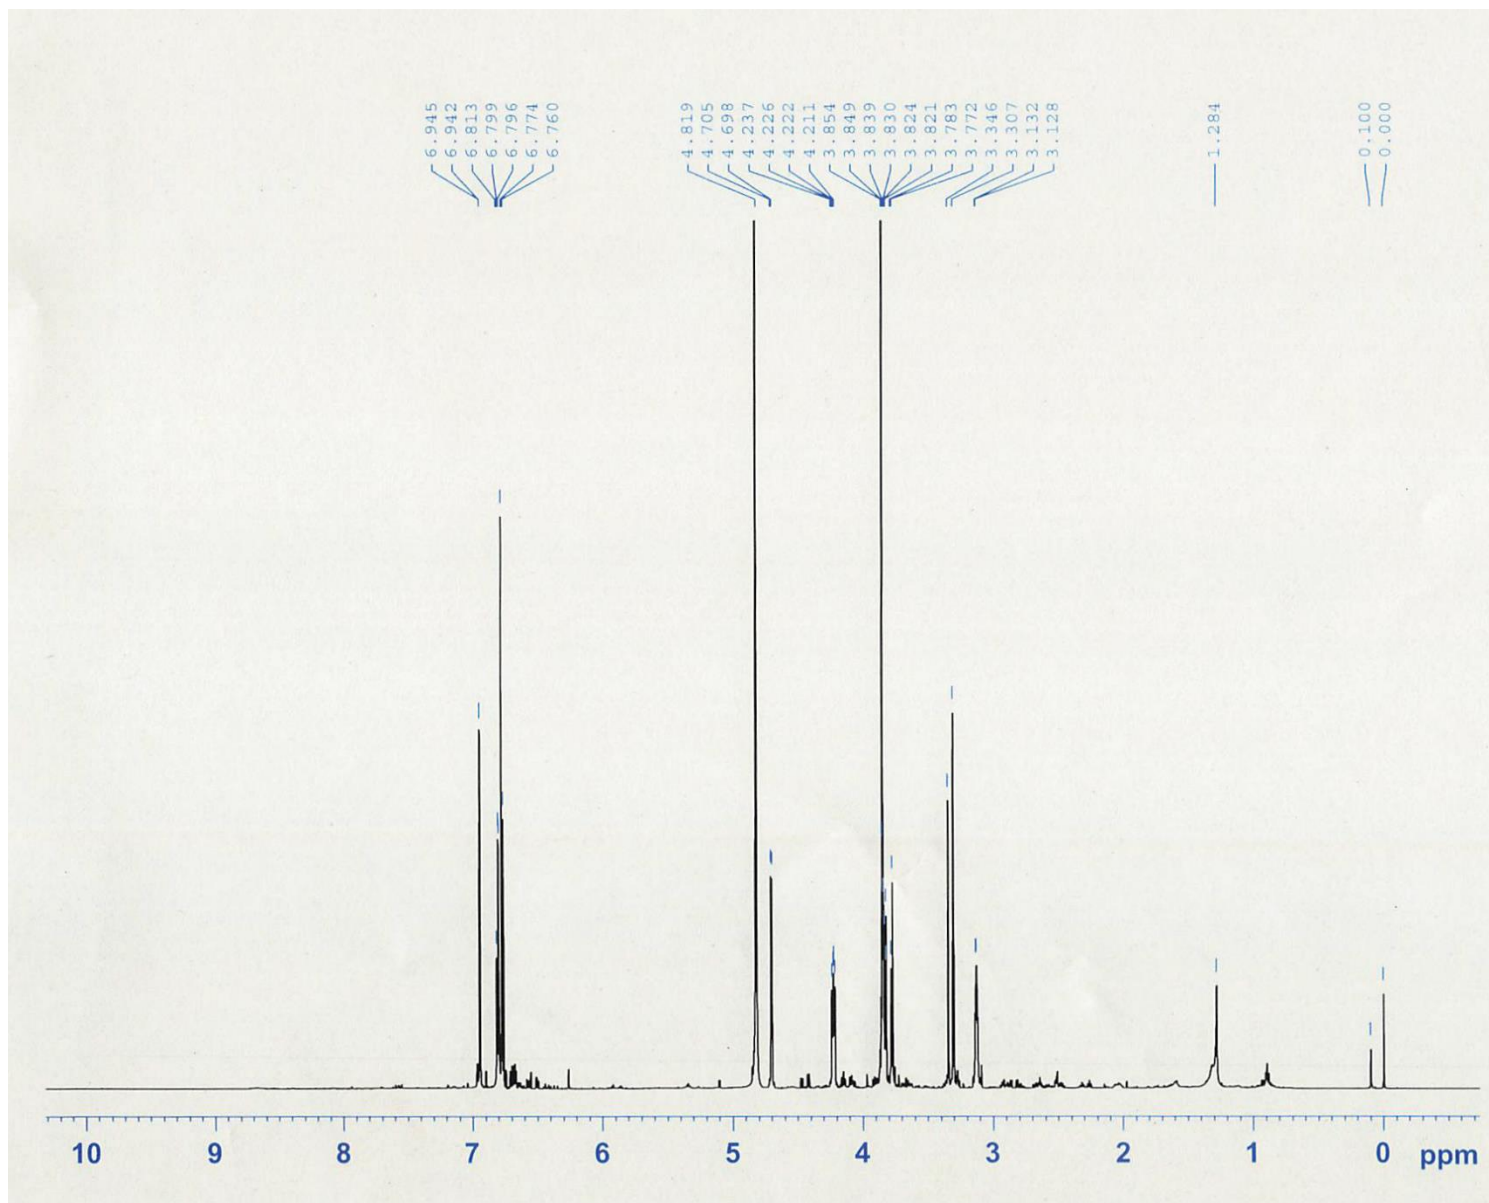

**Fig. S 10;  $^{13}\text{C}$  NMR spectrum of compound 3**

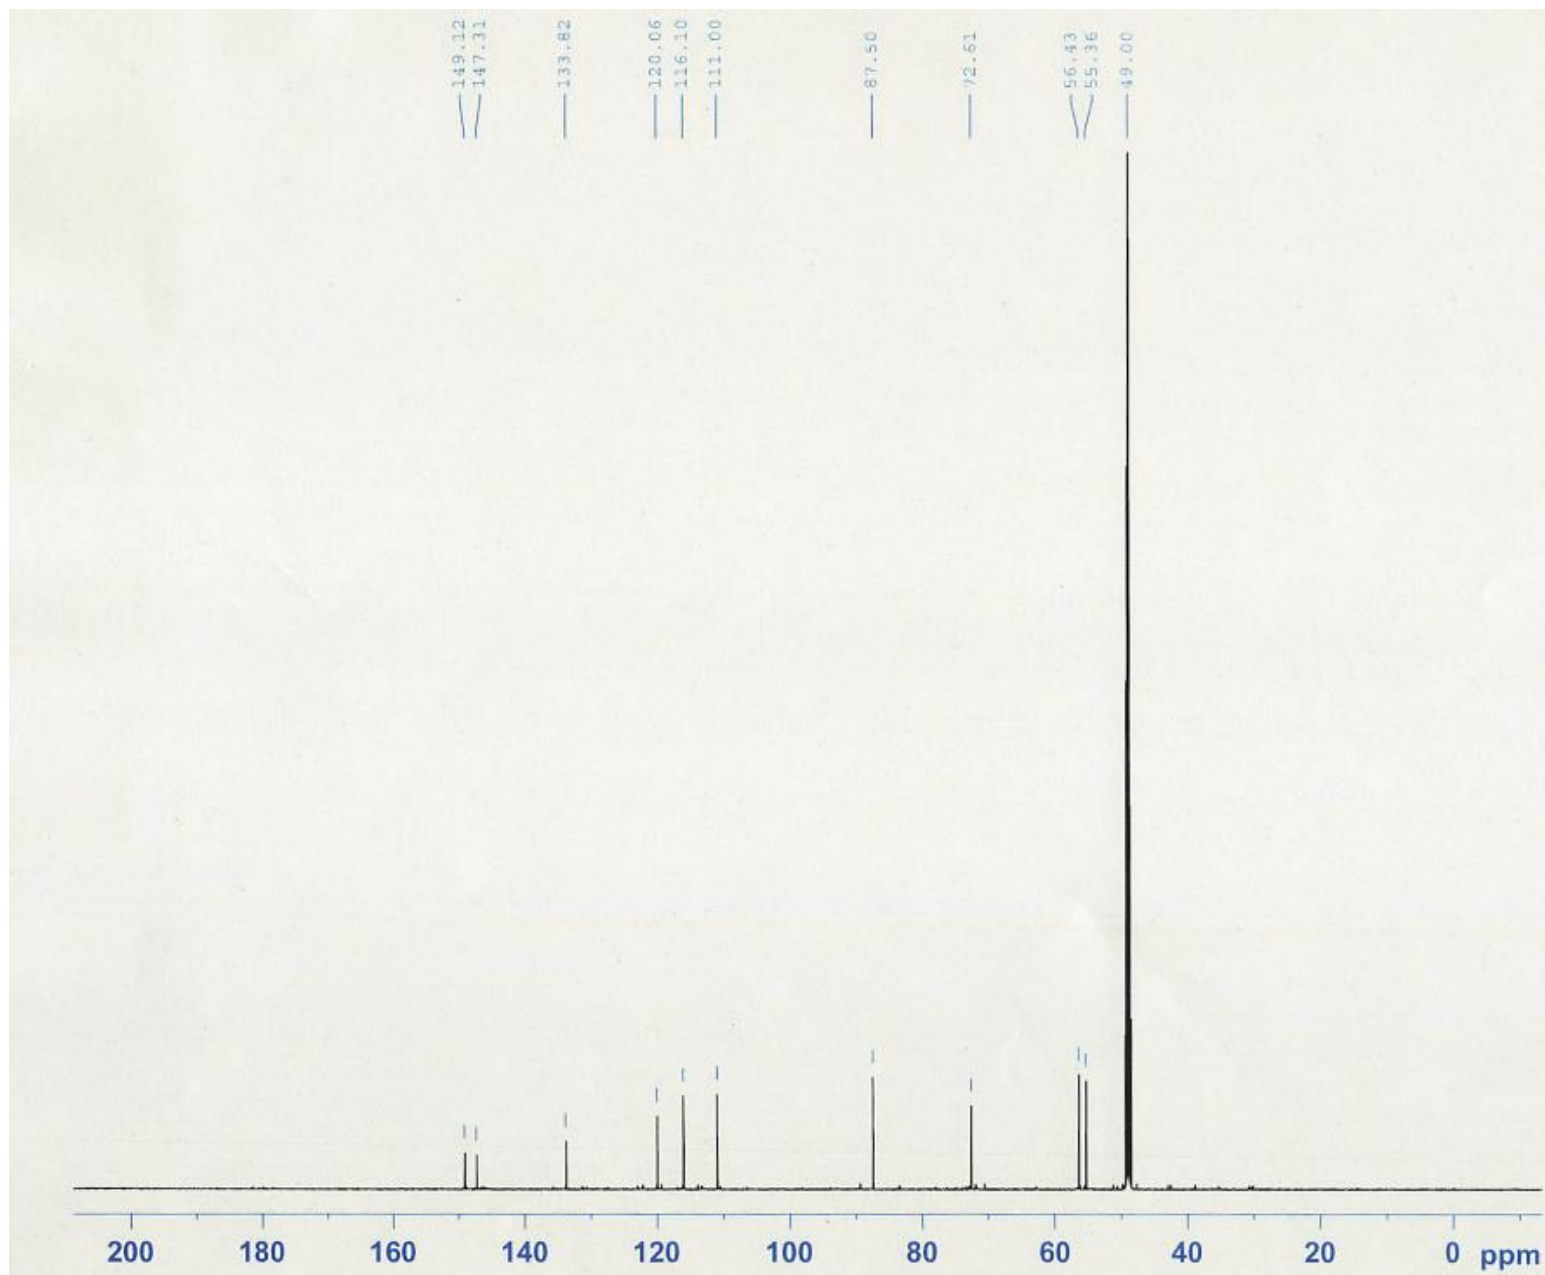

Fig. S 12; HSQC spectrum of compound 3

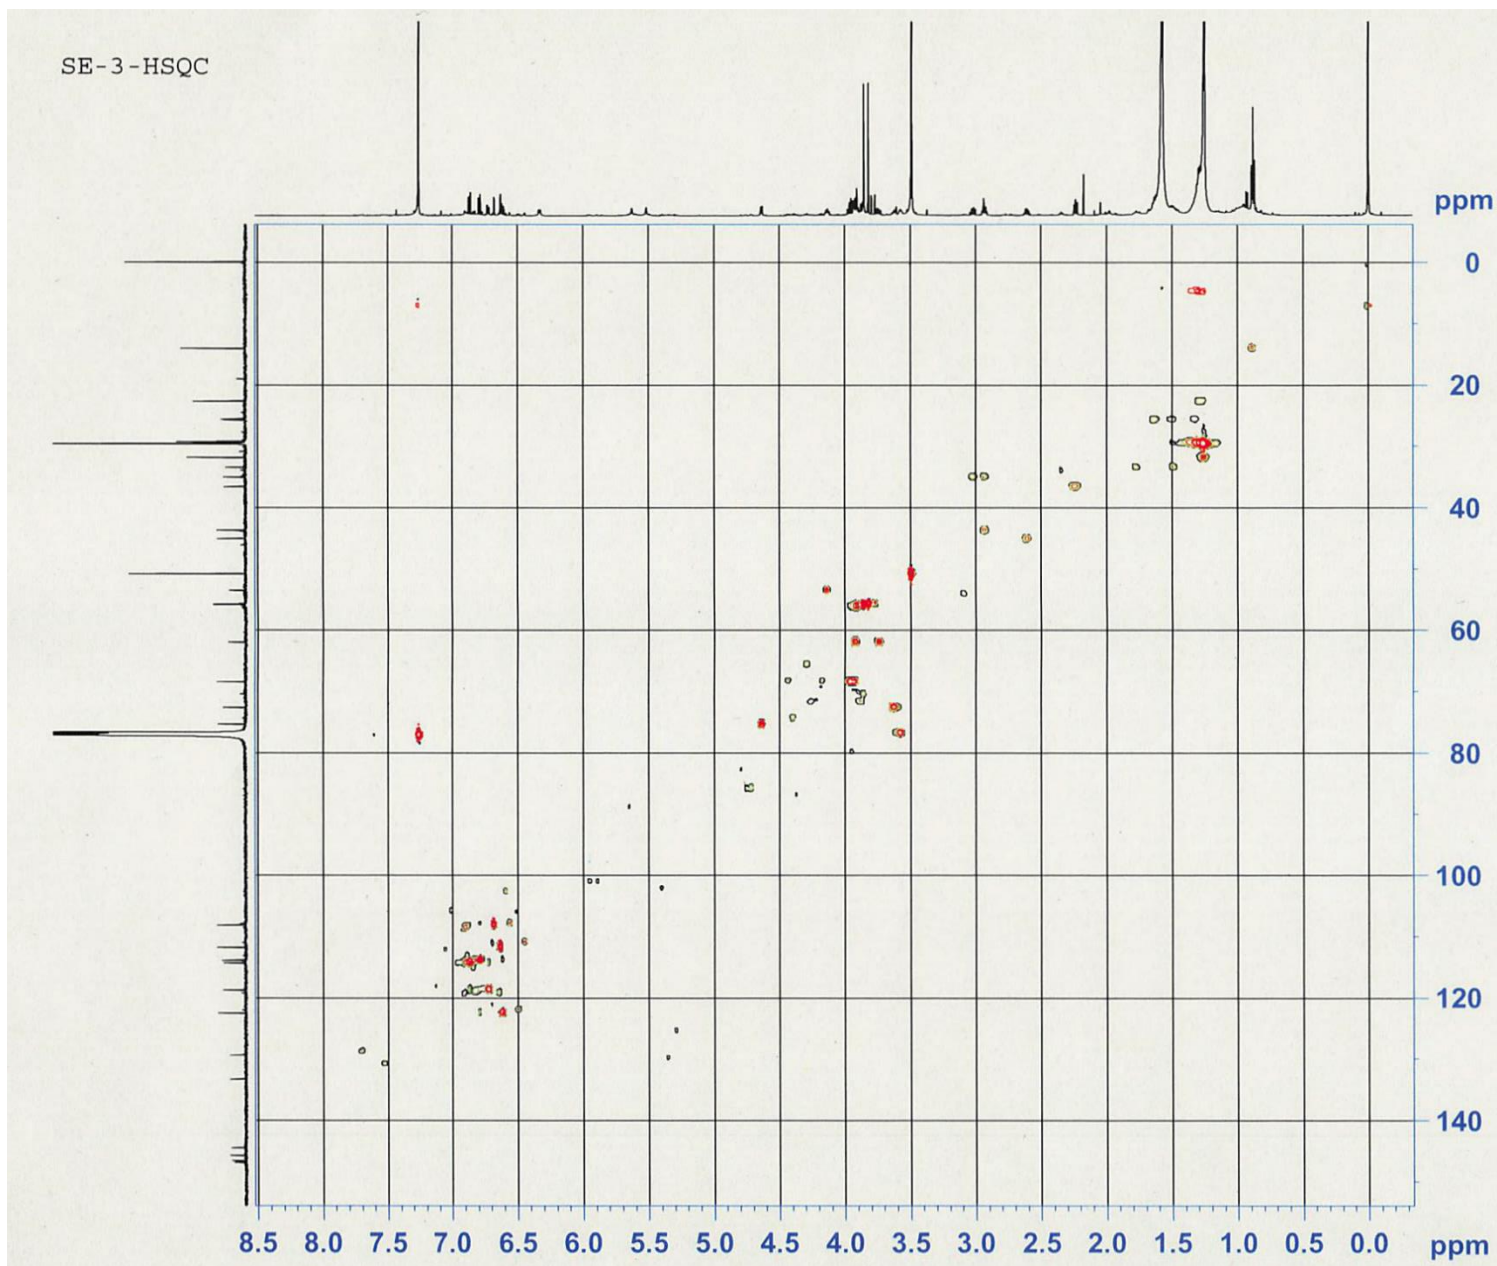

Fig. S 13; HMBC spectrum of compound 3

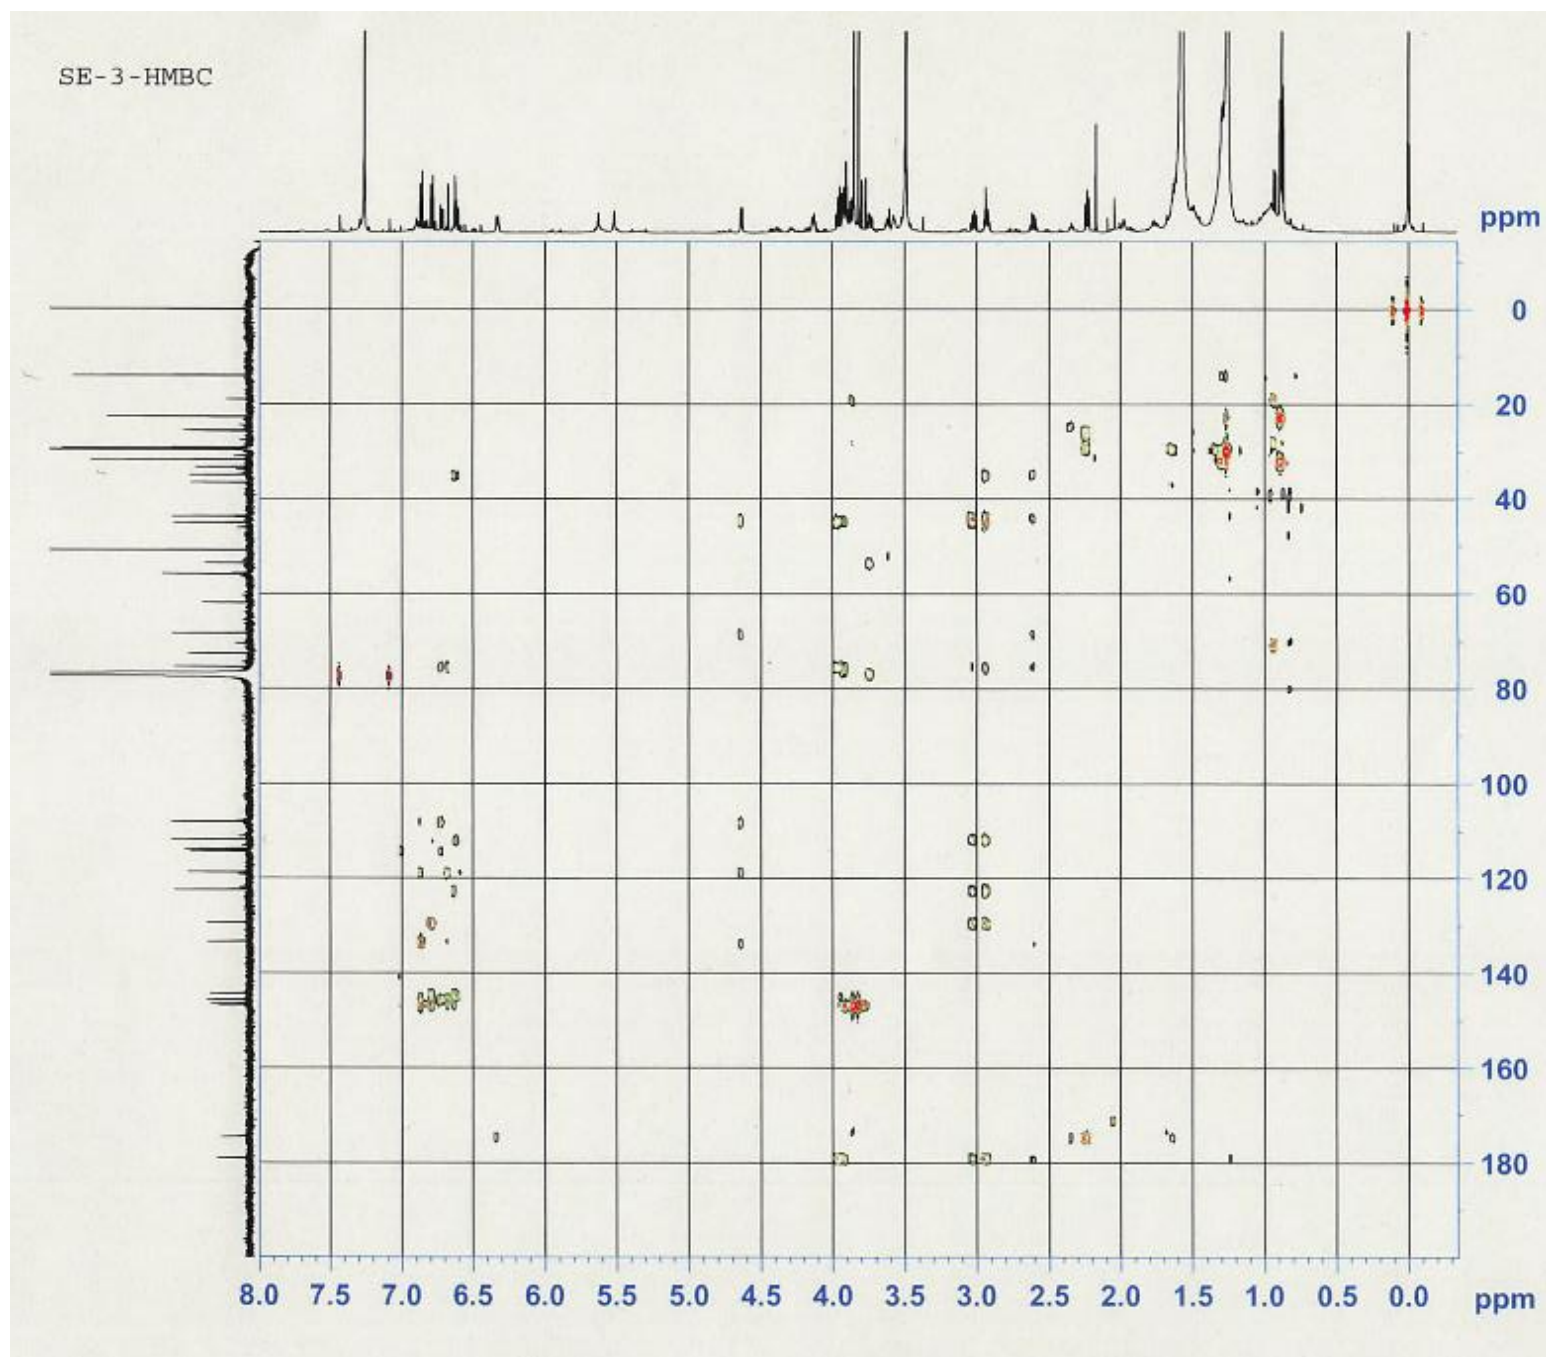

**Fig. S 14;  $^1\text{H}$  NMR spectrum of compound 4**

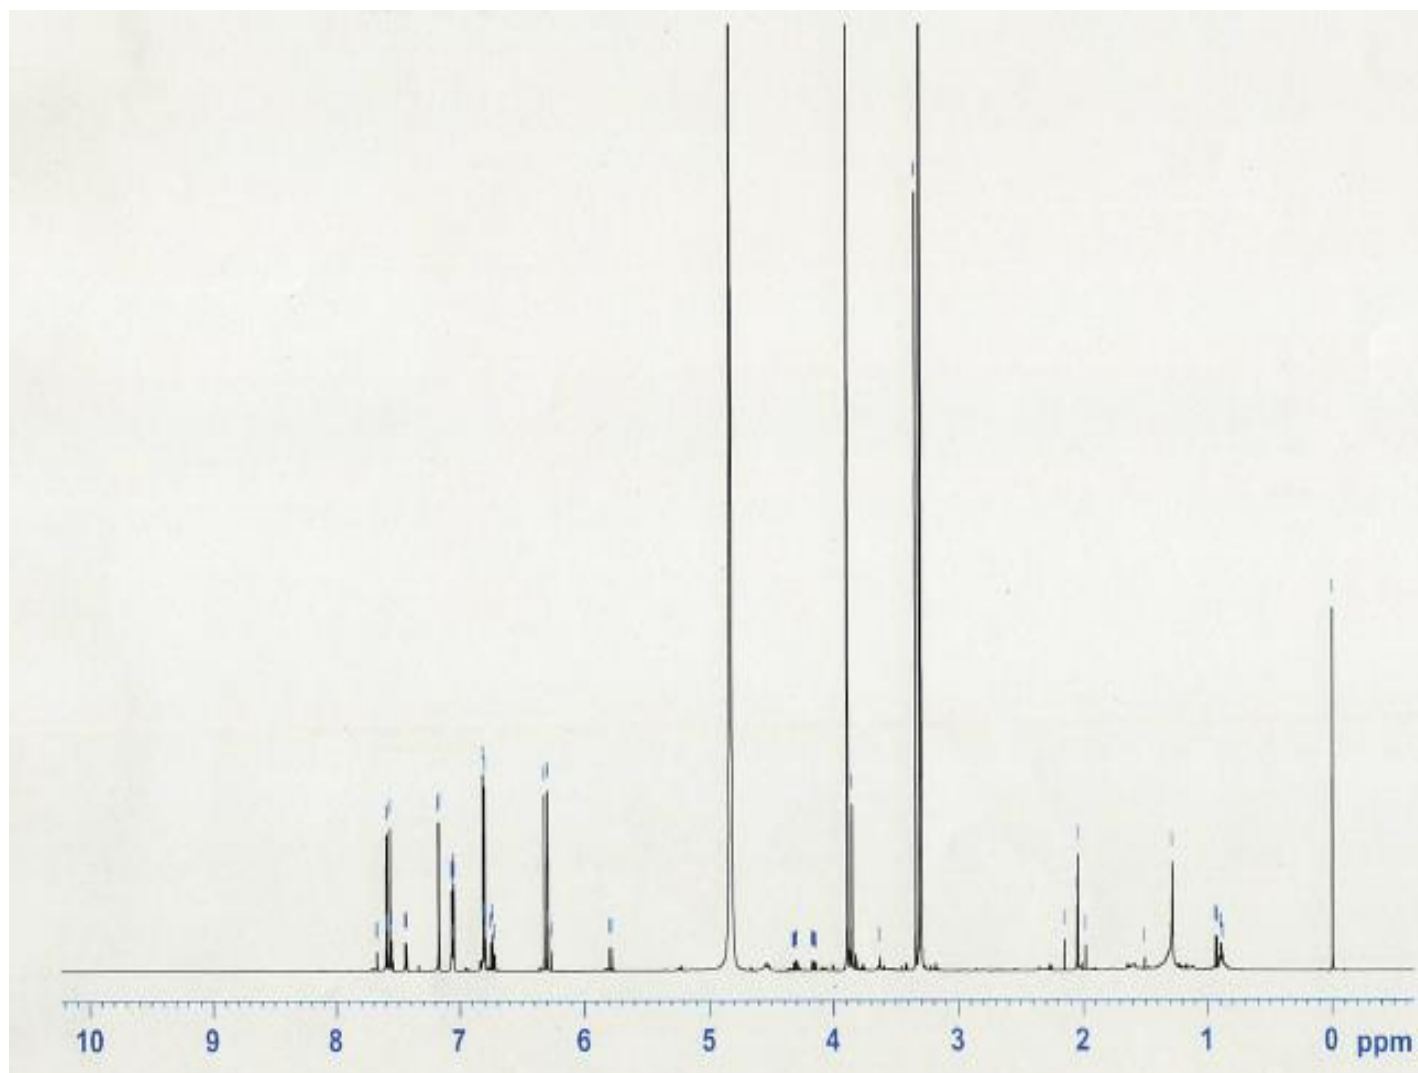

Fig. S 15;  $^{13}\text{C}$  NMR spectrum of compound 4

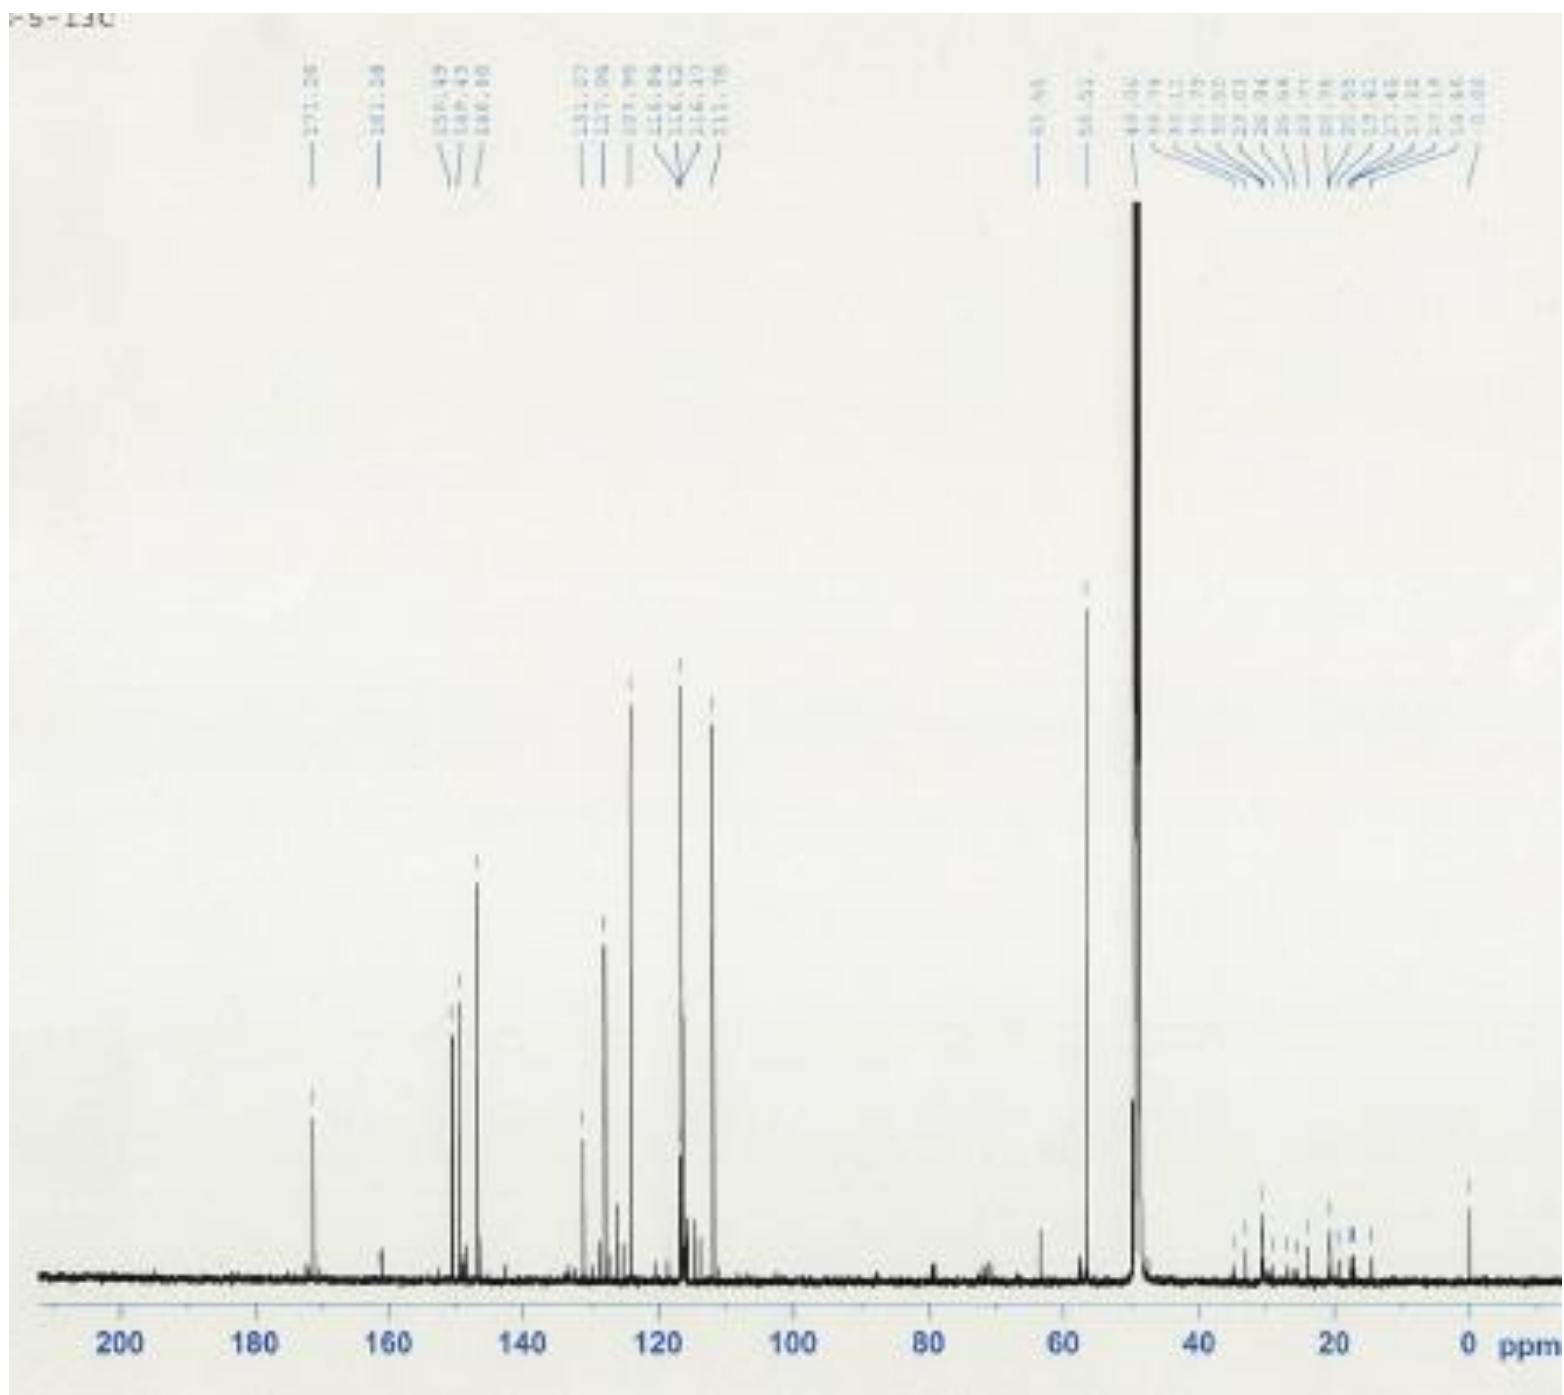

Fig. S 16; HSQC spectrum of compound 4

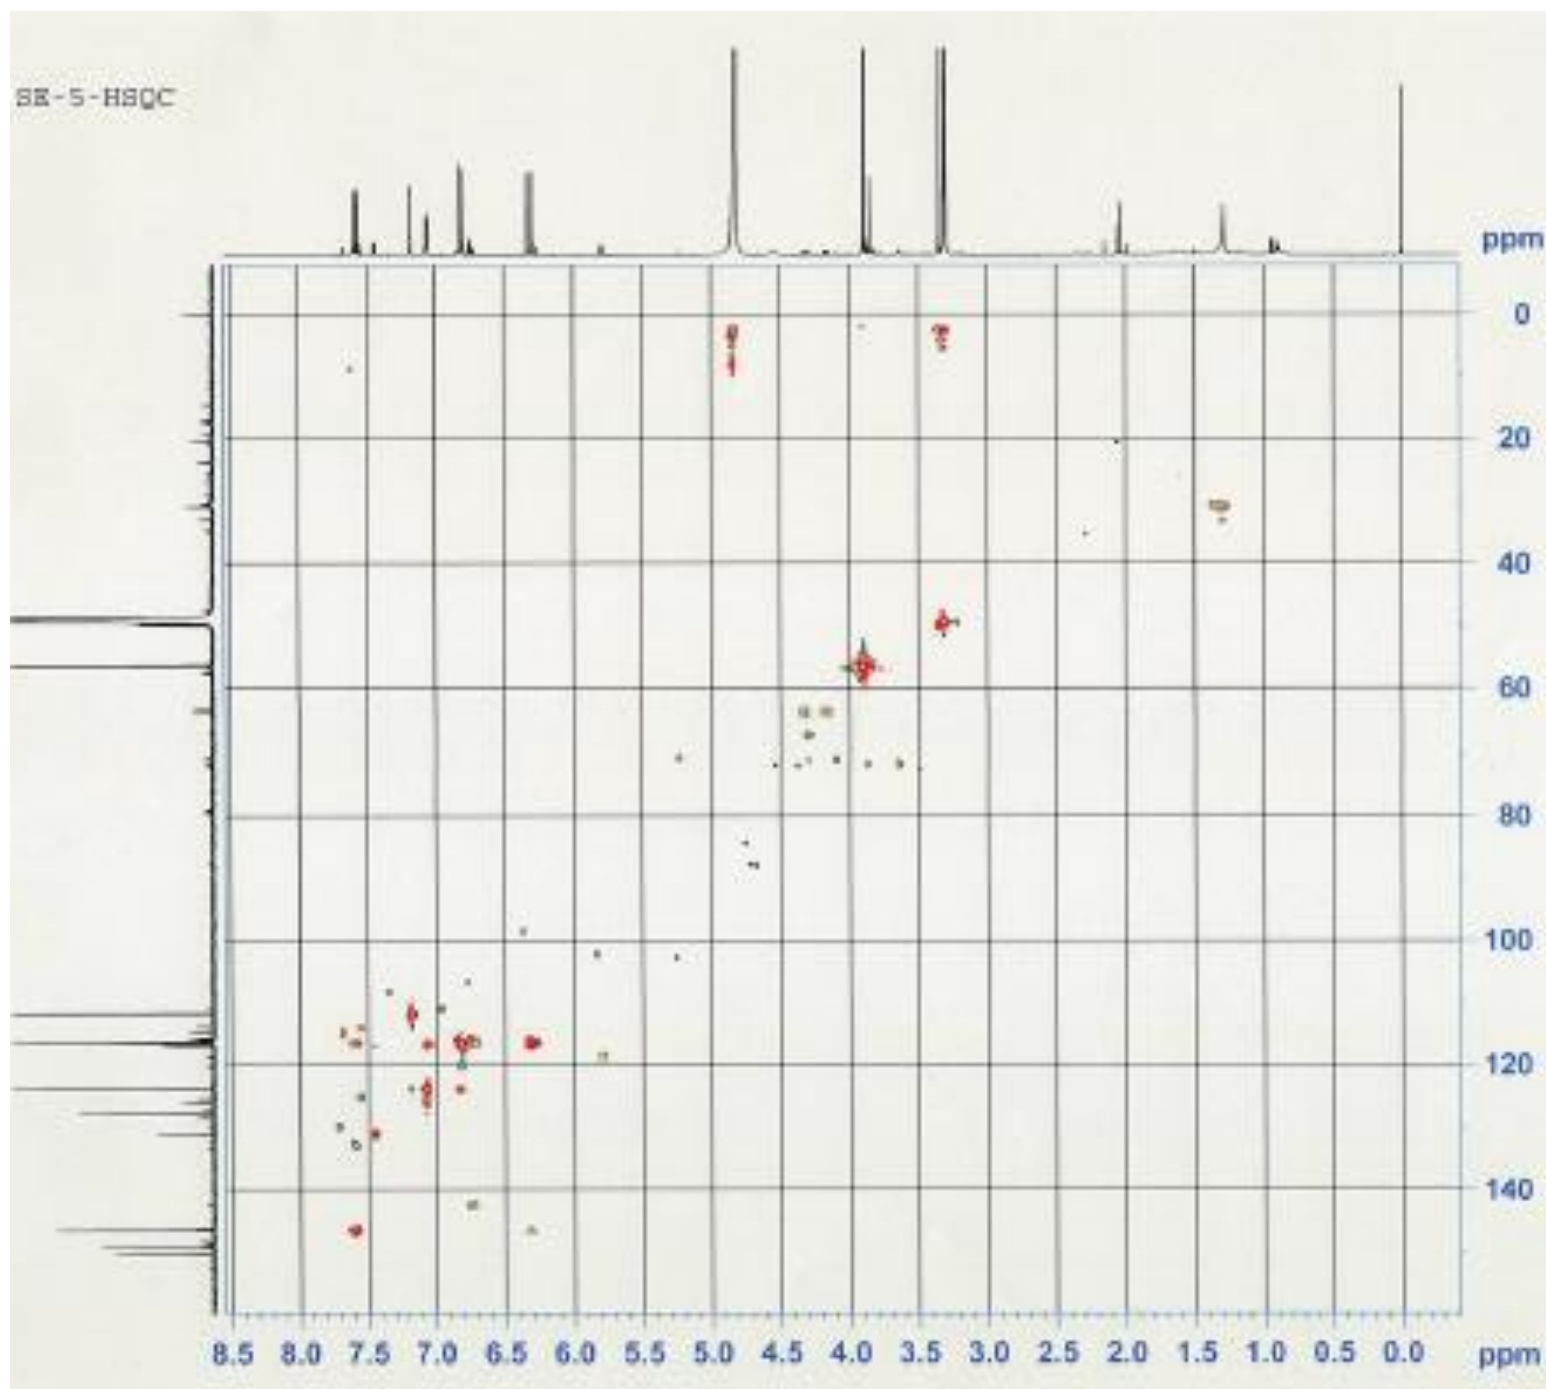

Fig. S 17; HMBC spectrum of compound 4

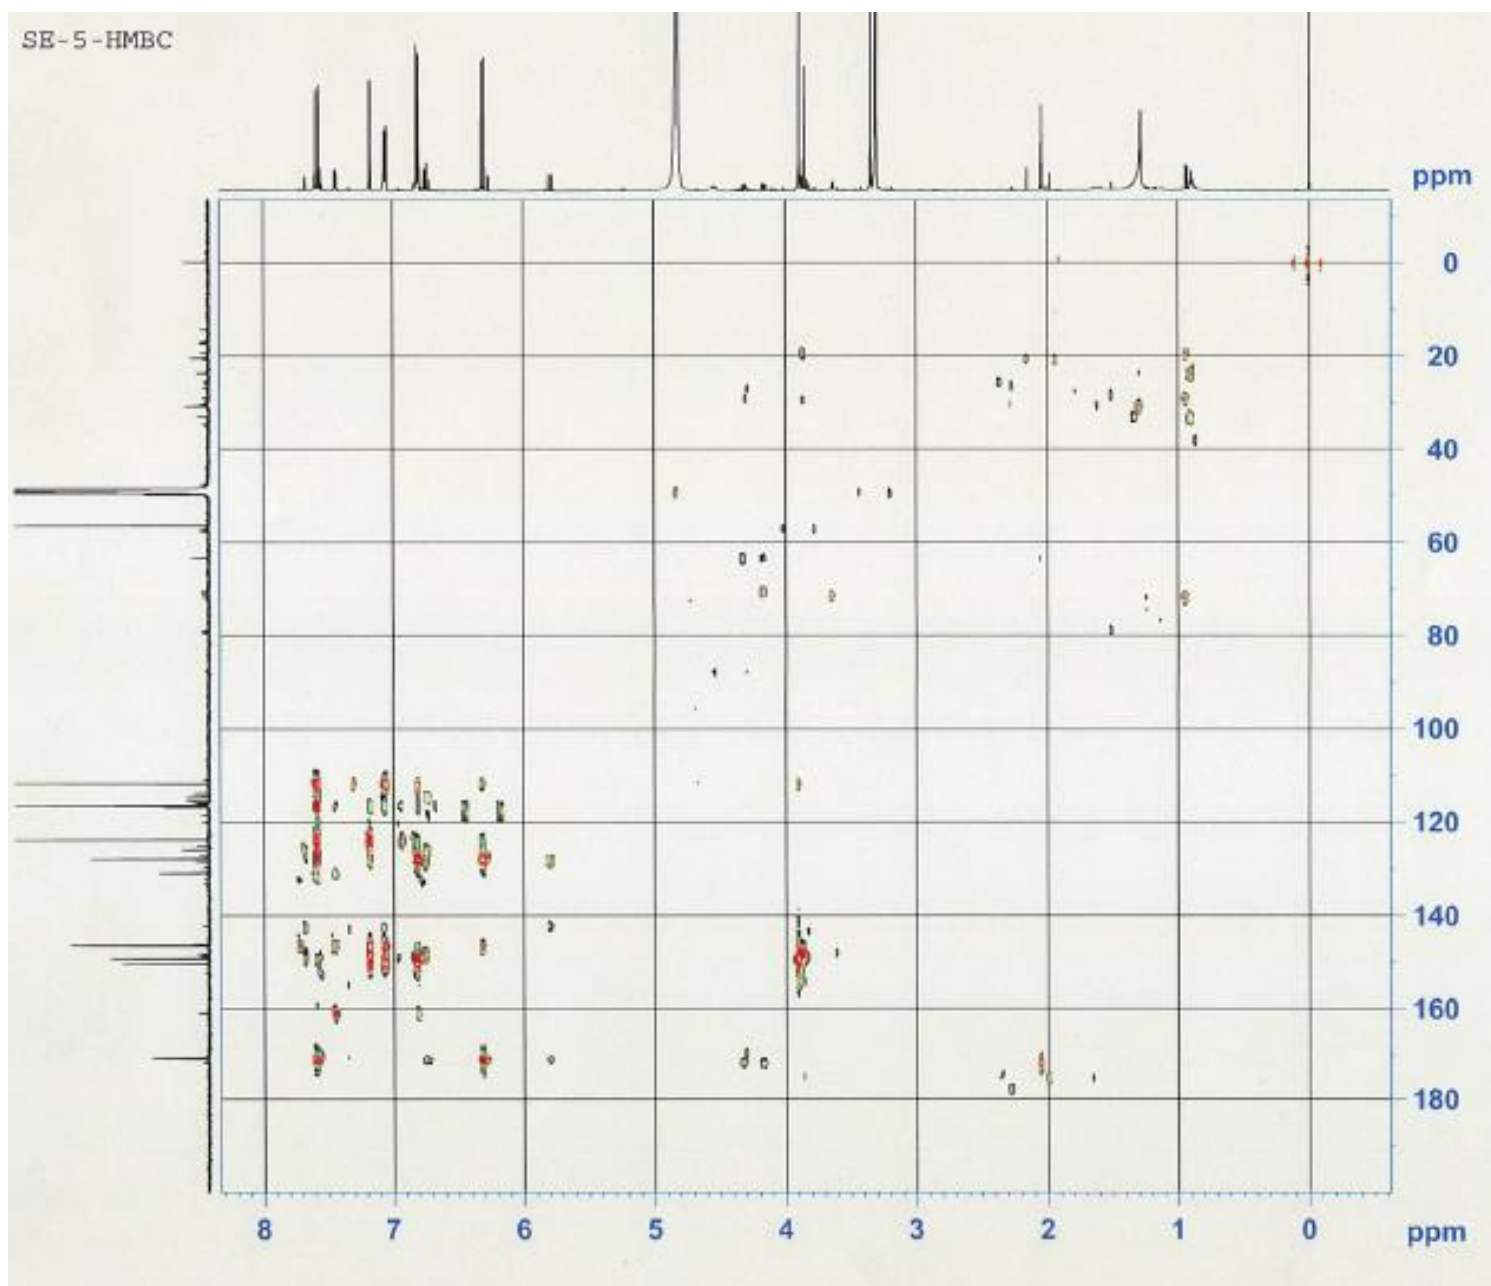



**Fig. S 18;  $^1\text{H}$  NMR spectrum of compound 5**

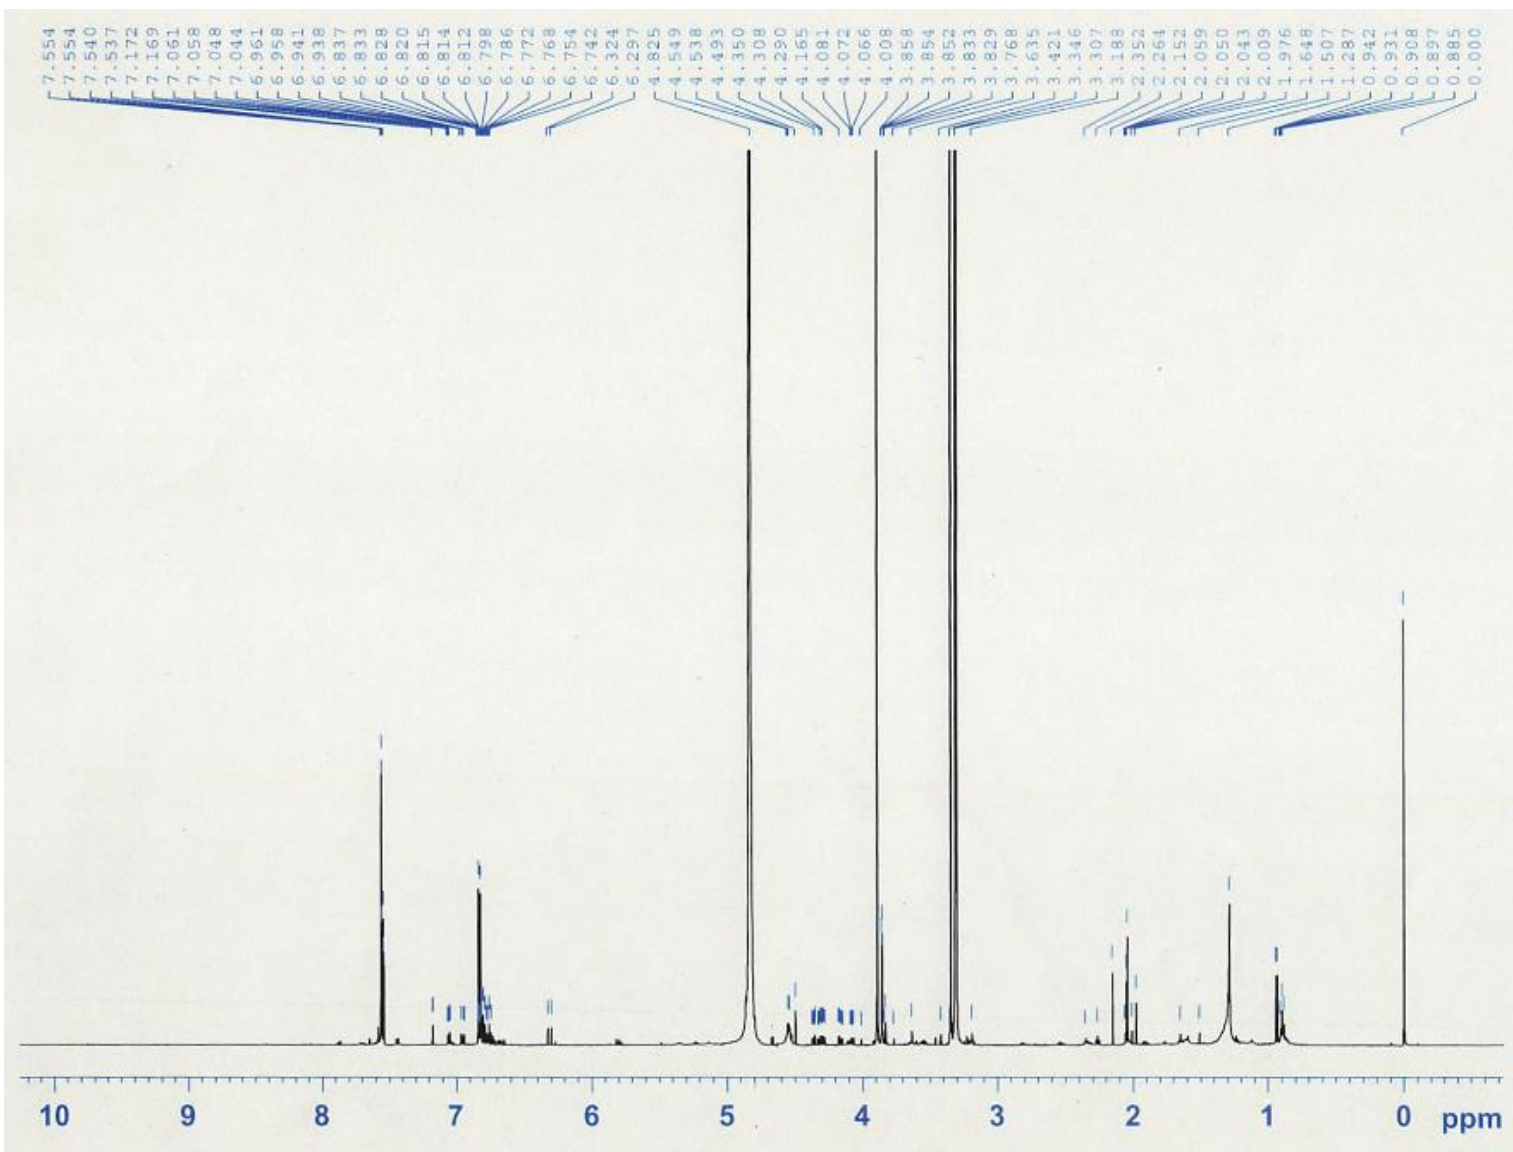

Fig. S 18;  $^{13}\text{C}$  NMR spectrum of compound 5

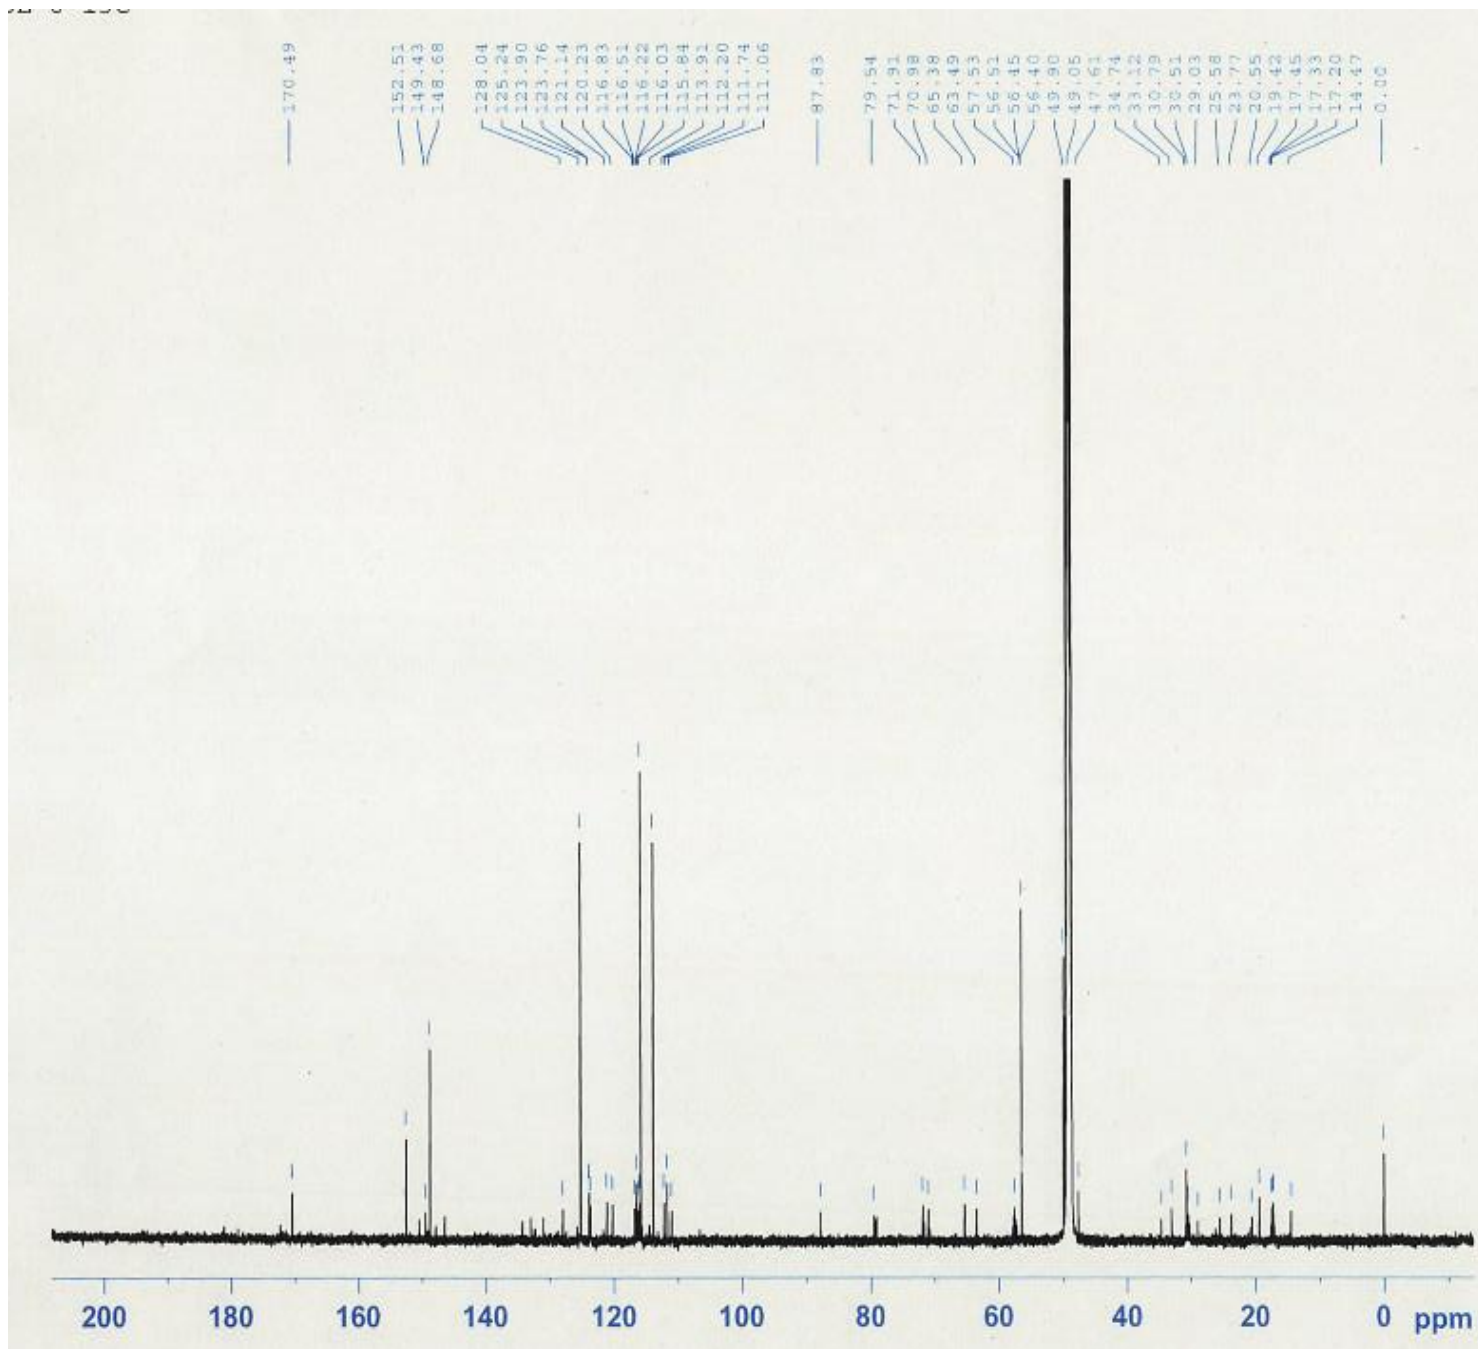

Fig. S 19; HSQC spectrum of compound 5

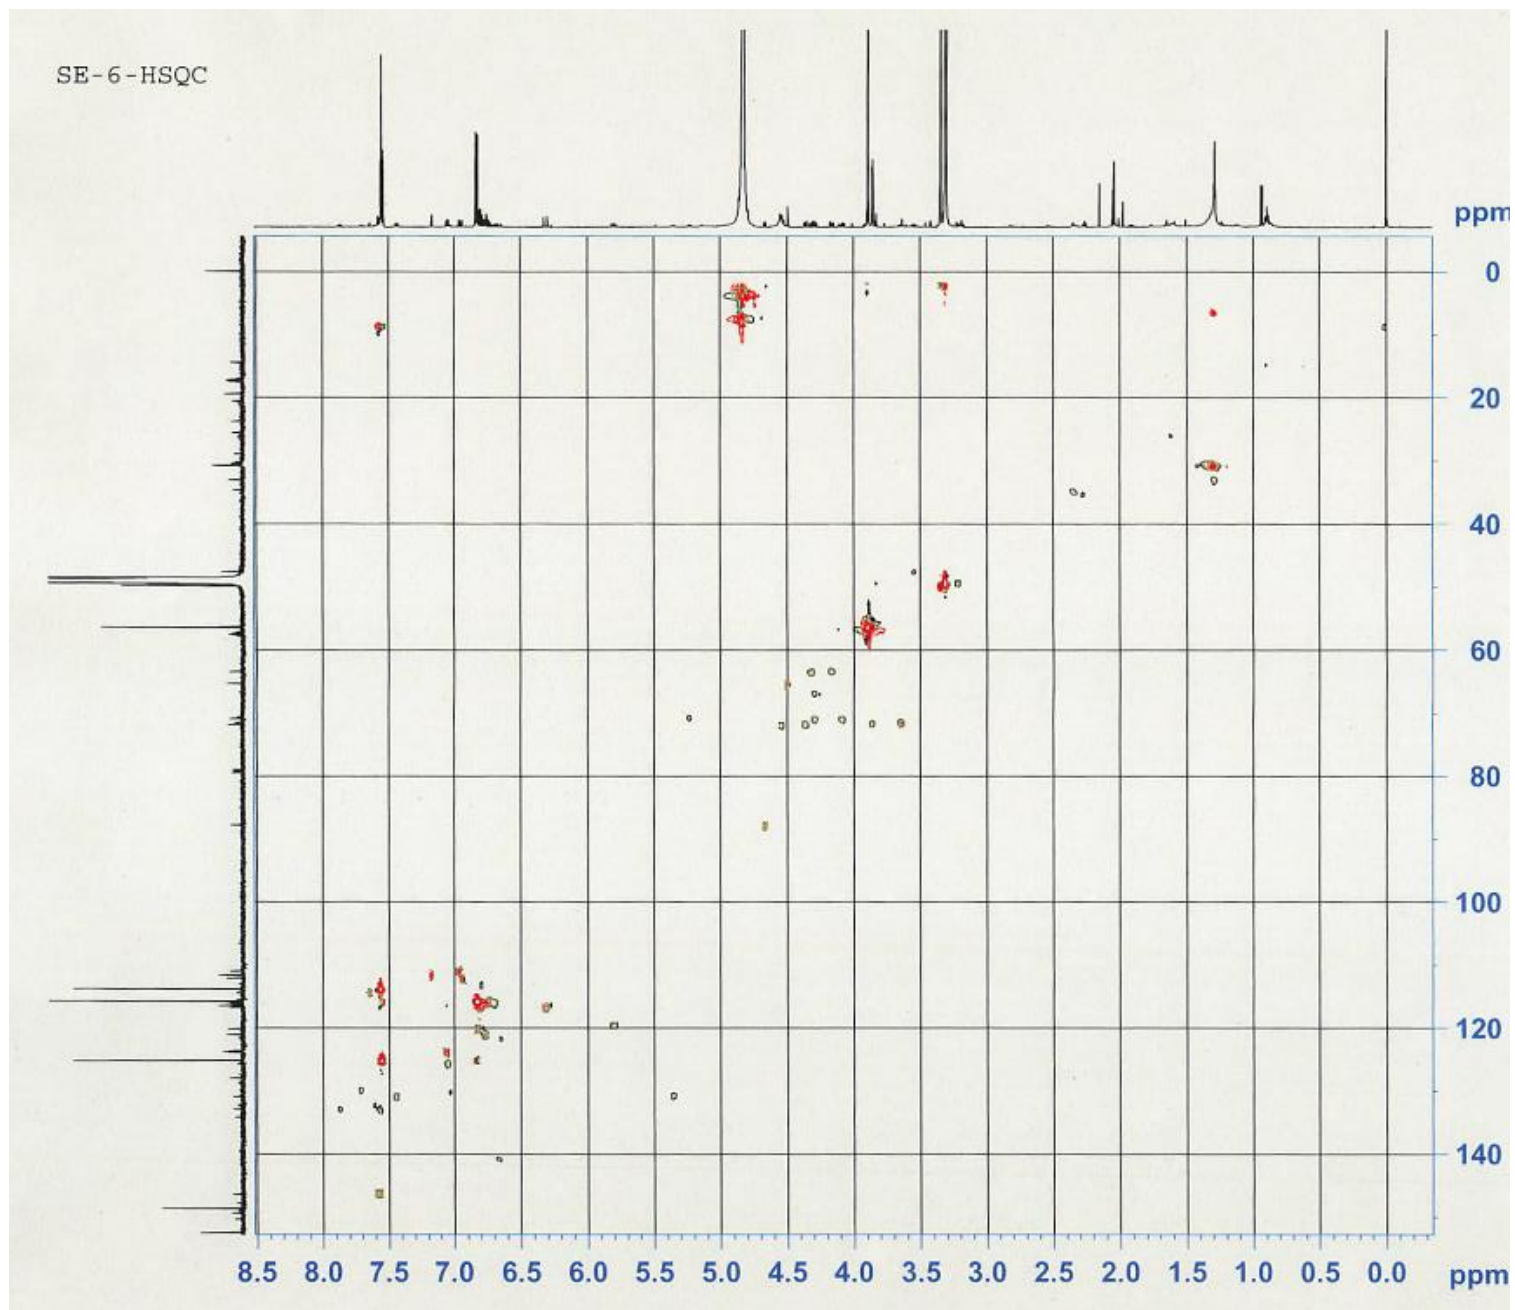

Fig. S 20; HSQC spectrum of compound 5

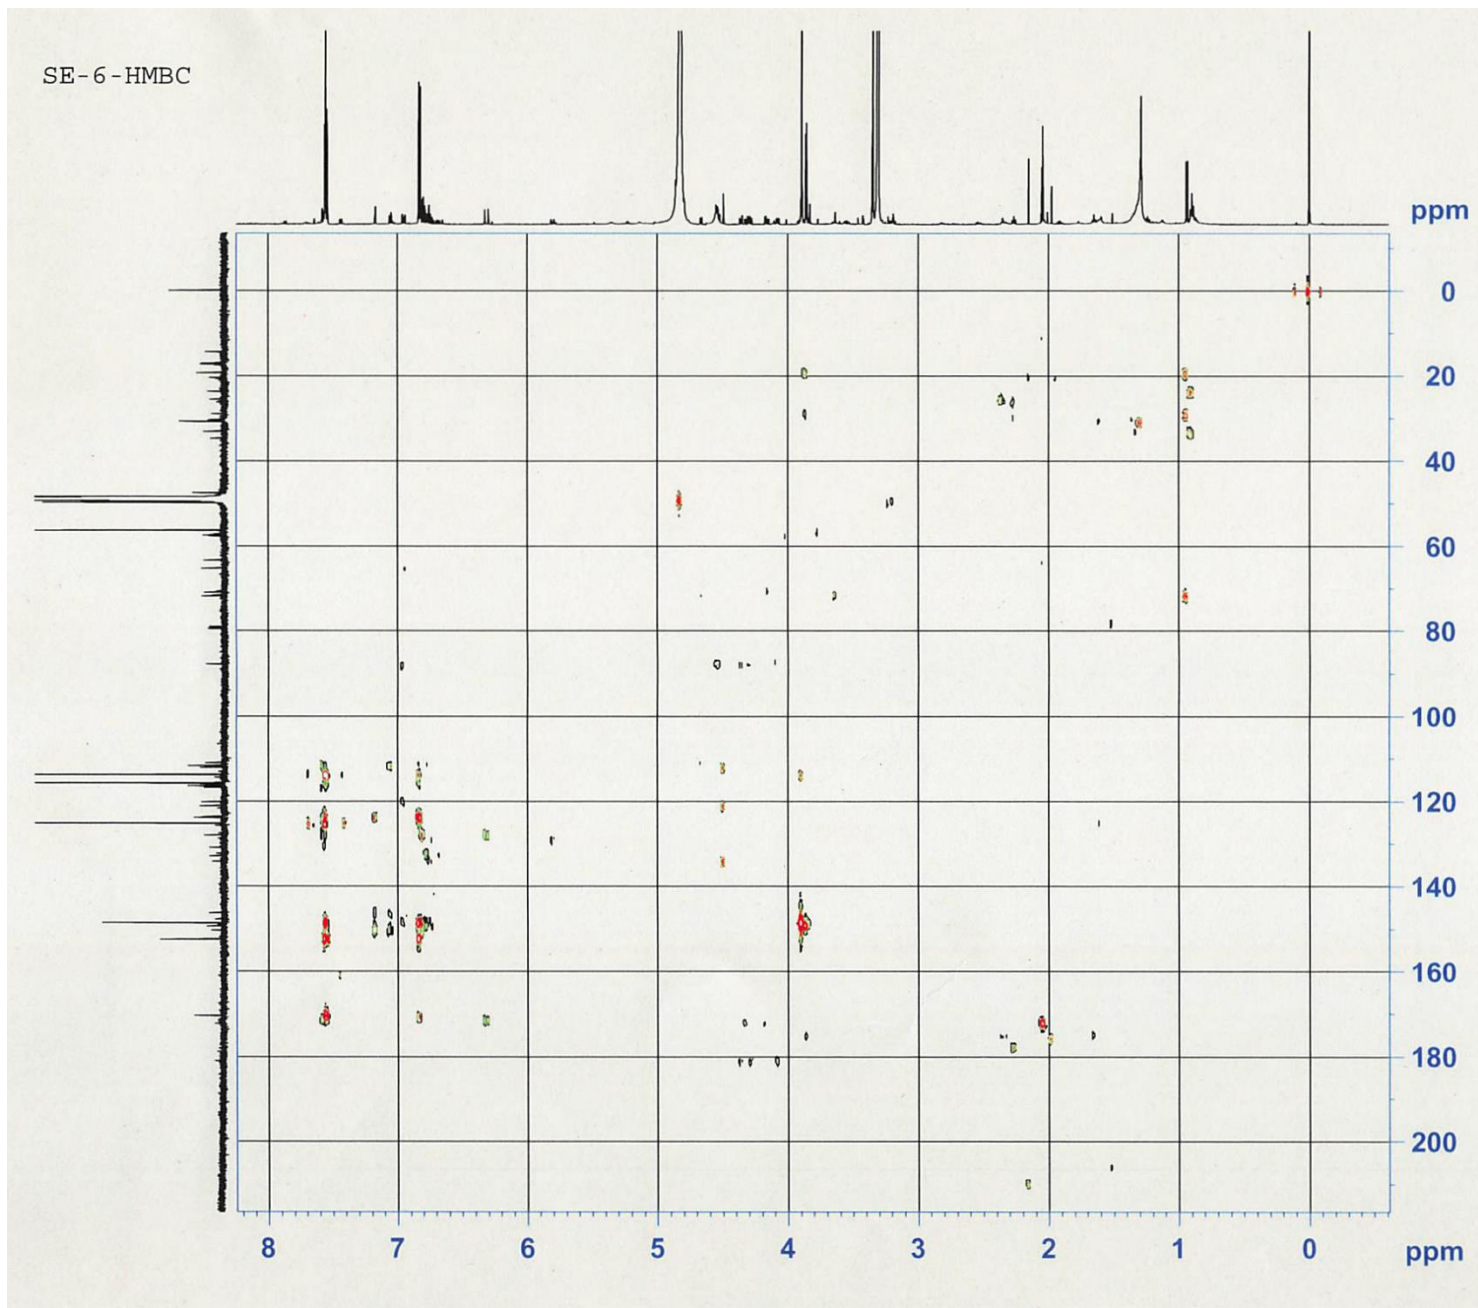

**Fig. S 21; <sup>1</sup>H NMR spectrum of compound 6**

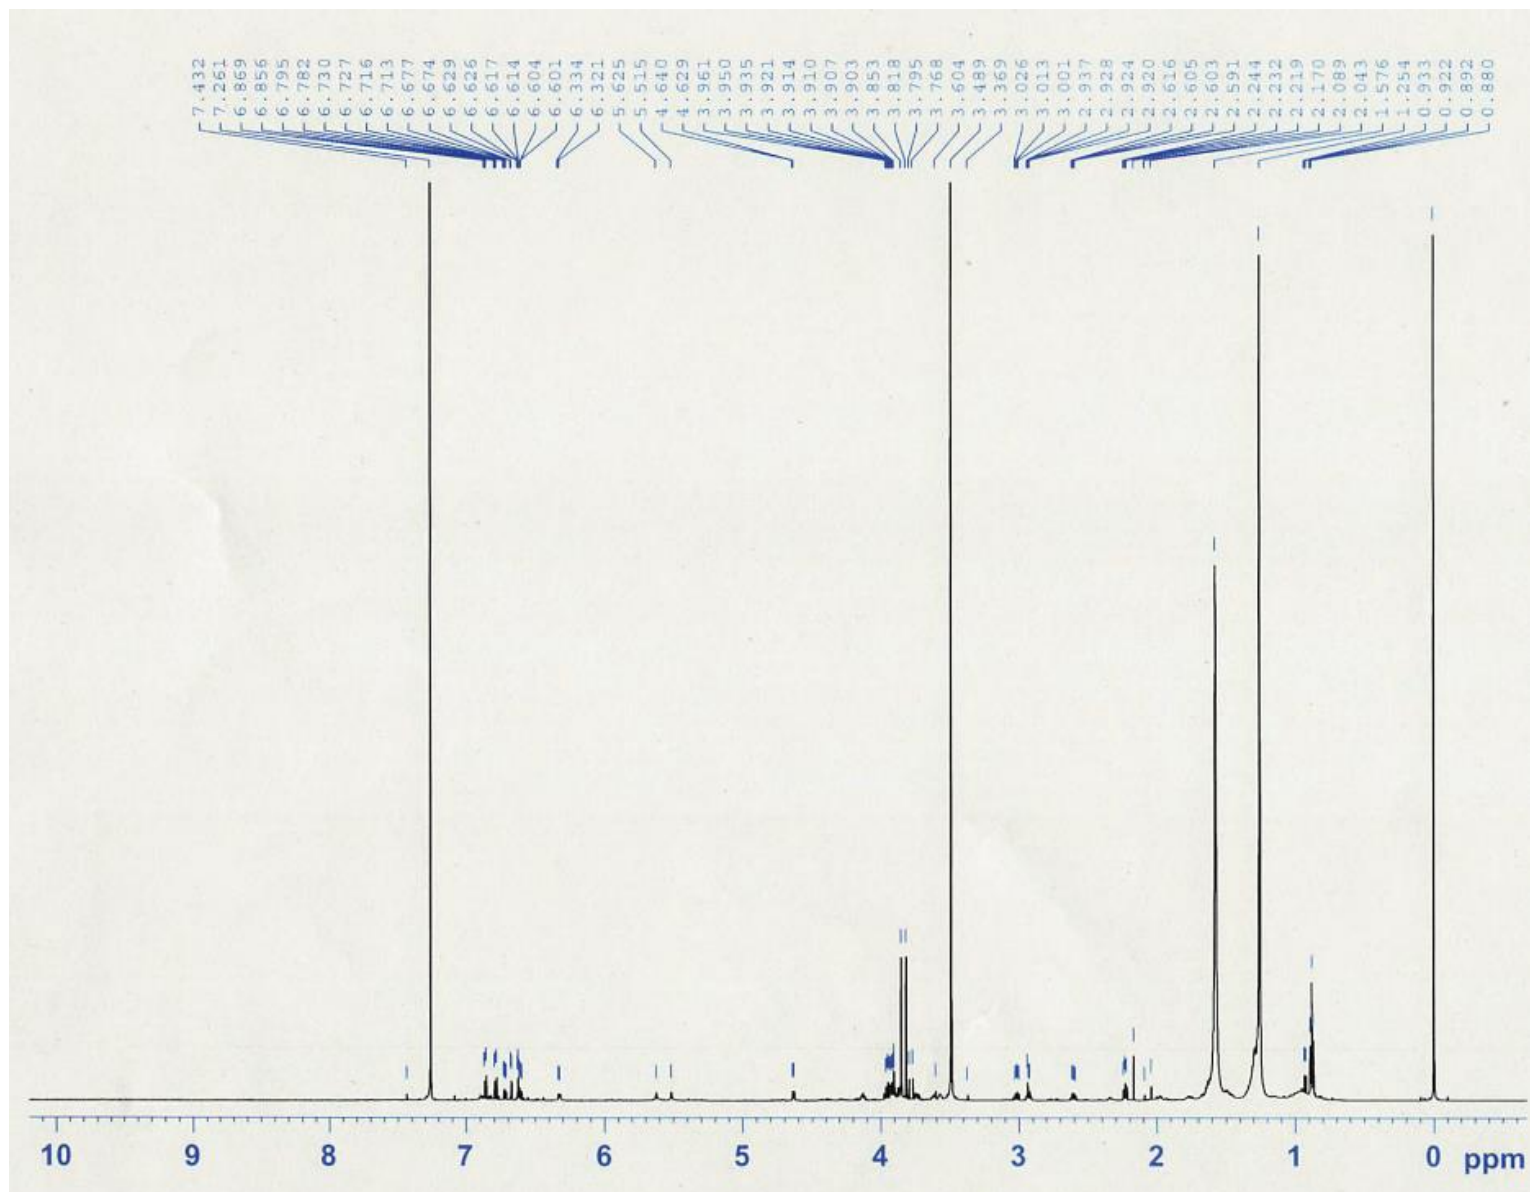

**Fig. S 22;  $^{13}\text{C}$  NMR spectrum of compound 6**

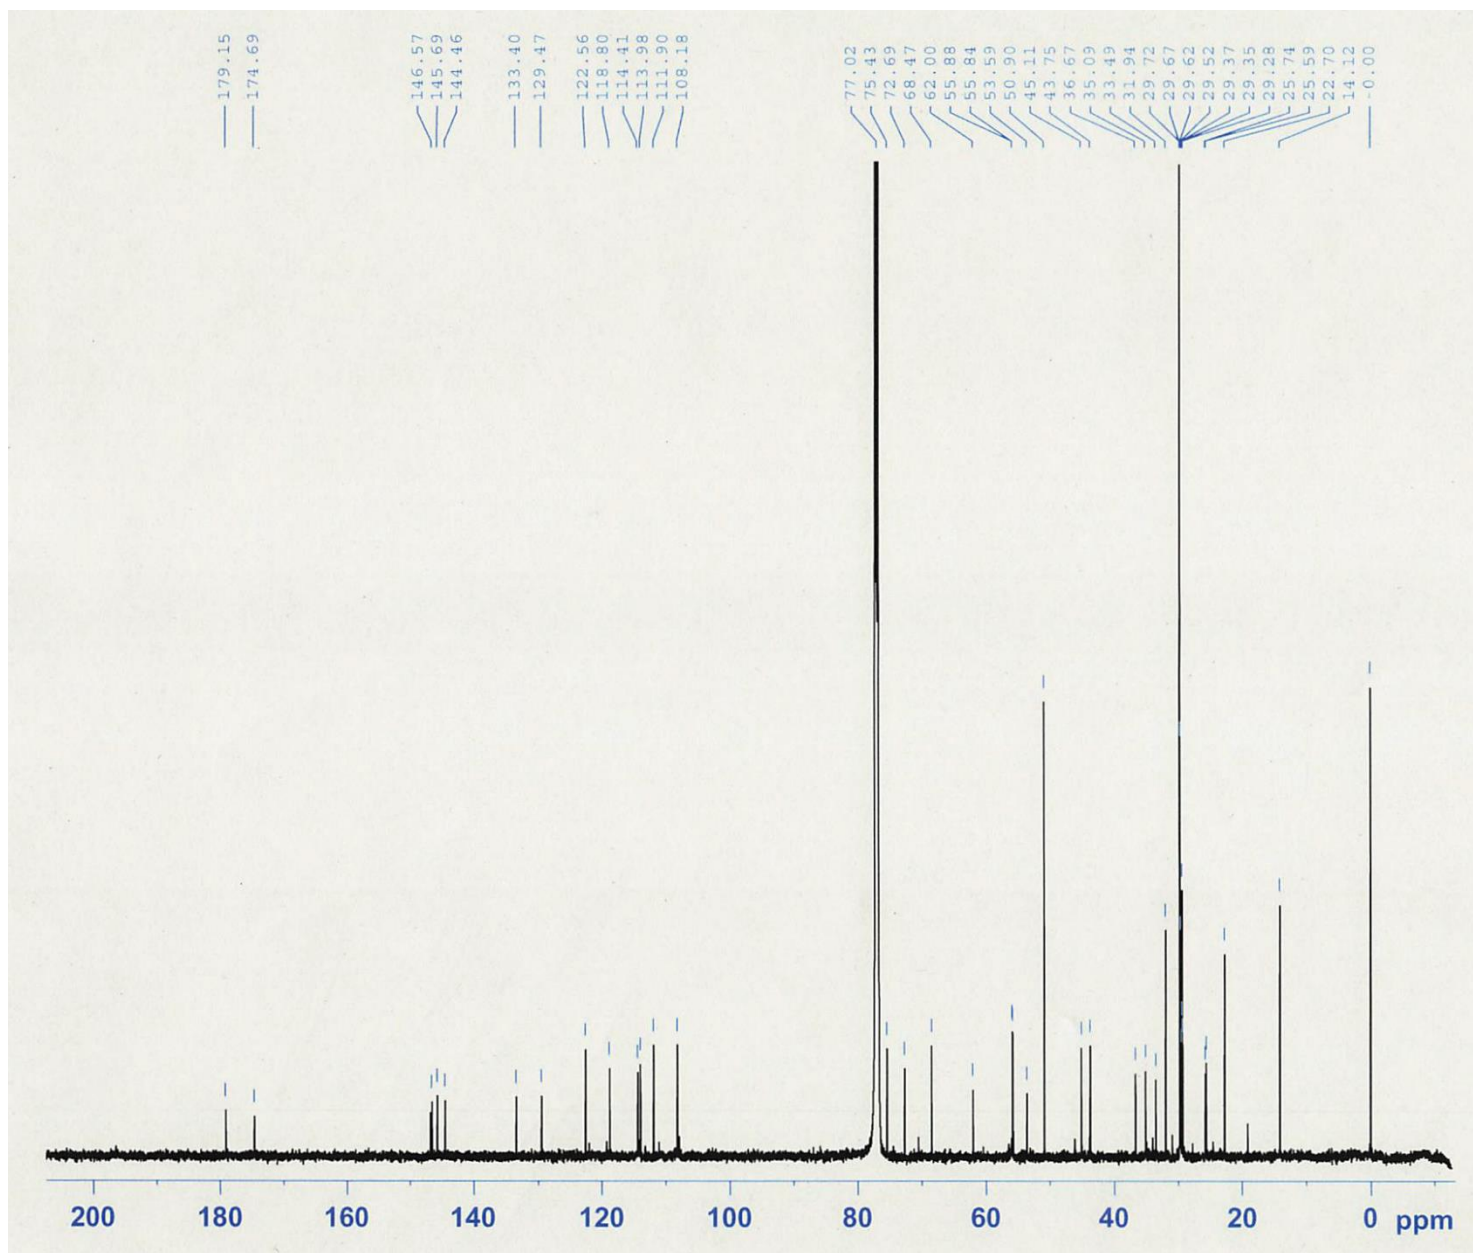

**Fig. S 23; HSQC spectrum of compound 6**

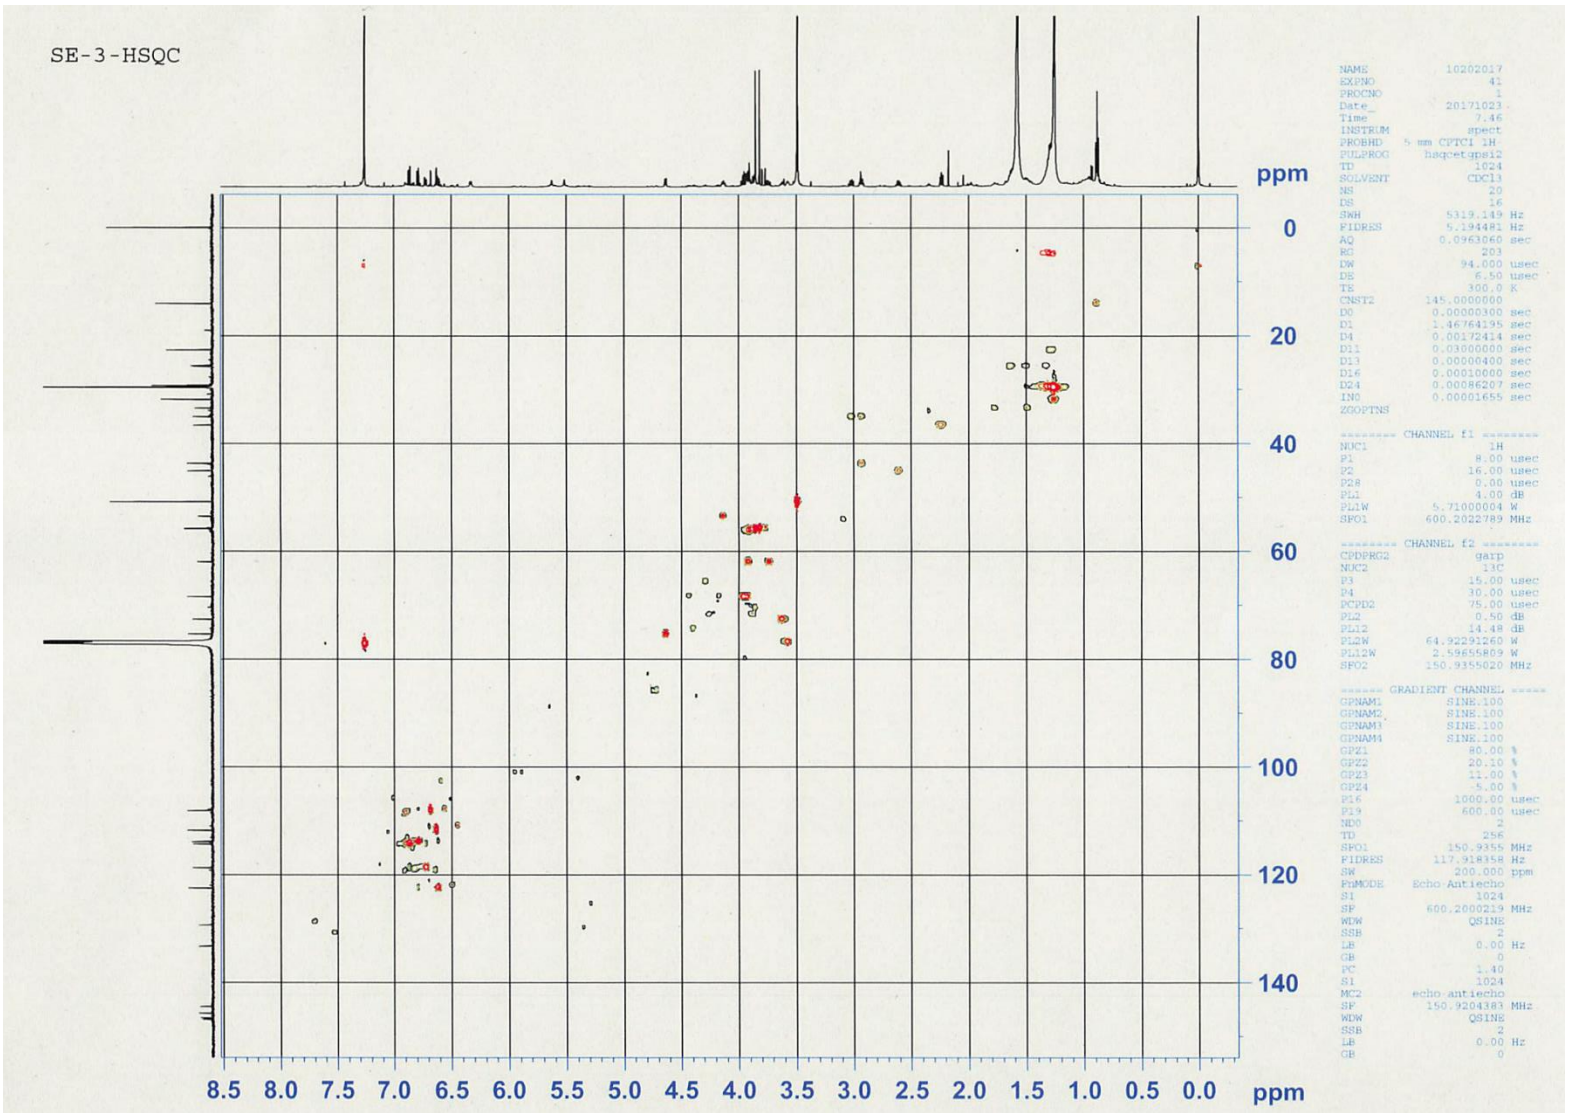

Fig. S 24; HMBC spectrum of compound 6

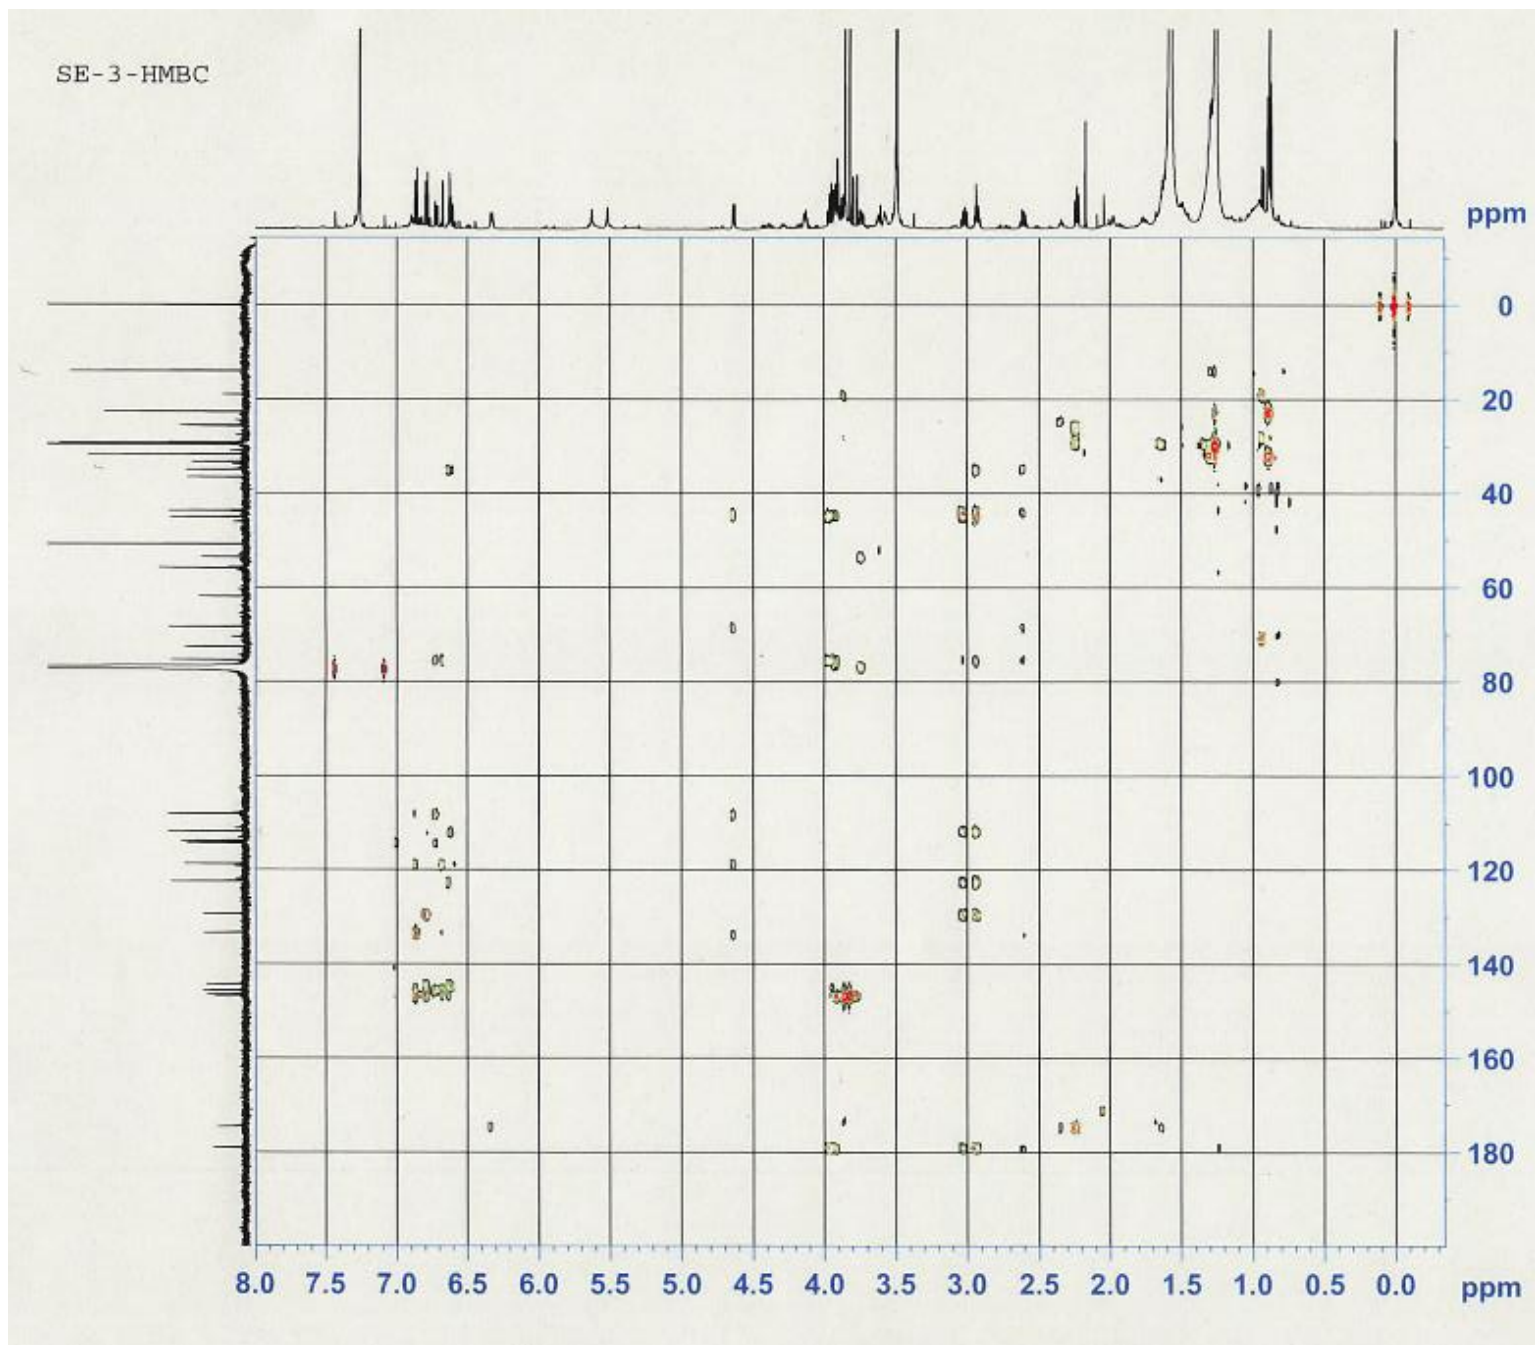



**Fig. S 25;  $^1\text{H}$  NMR spectrum of compound 7**

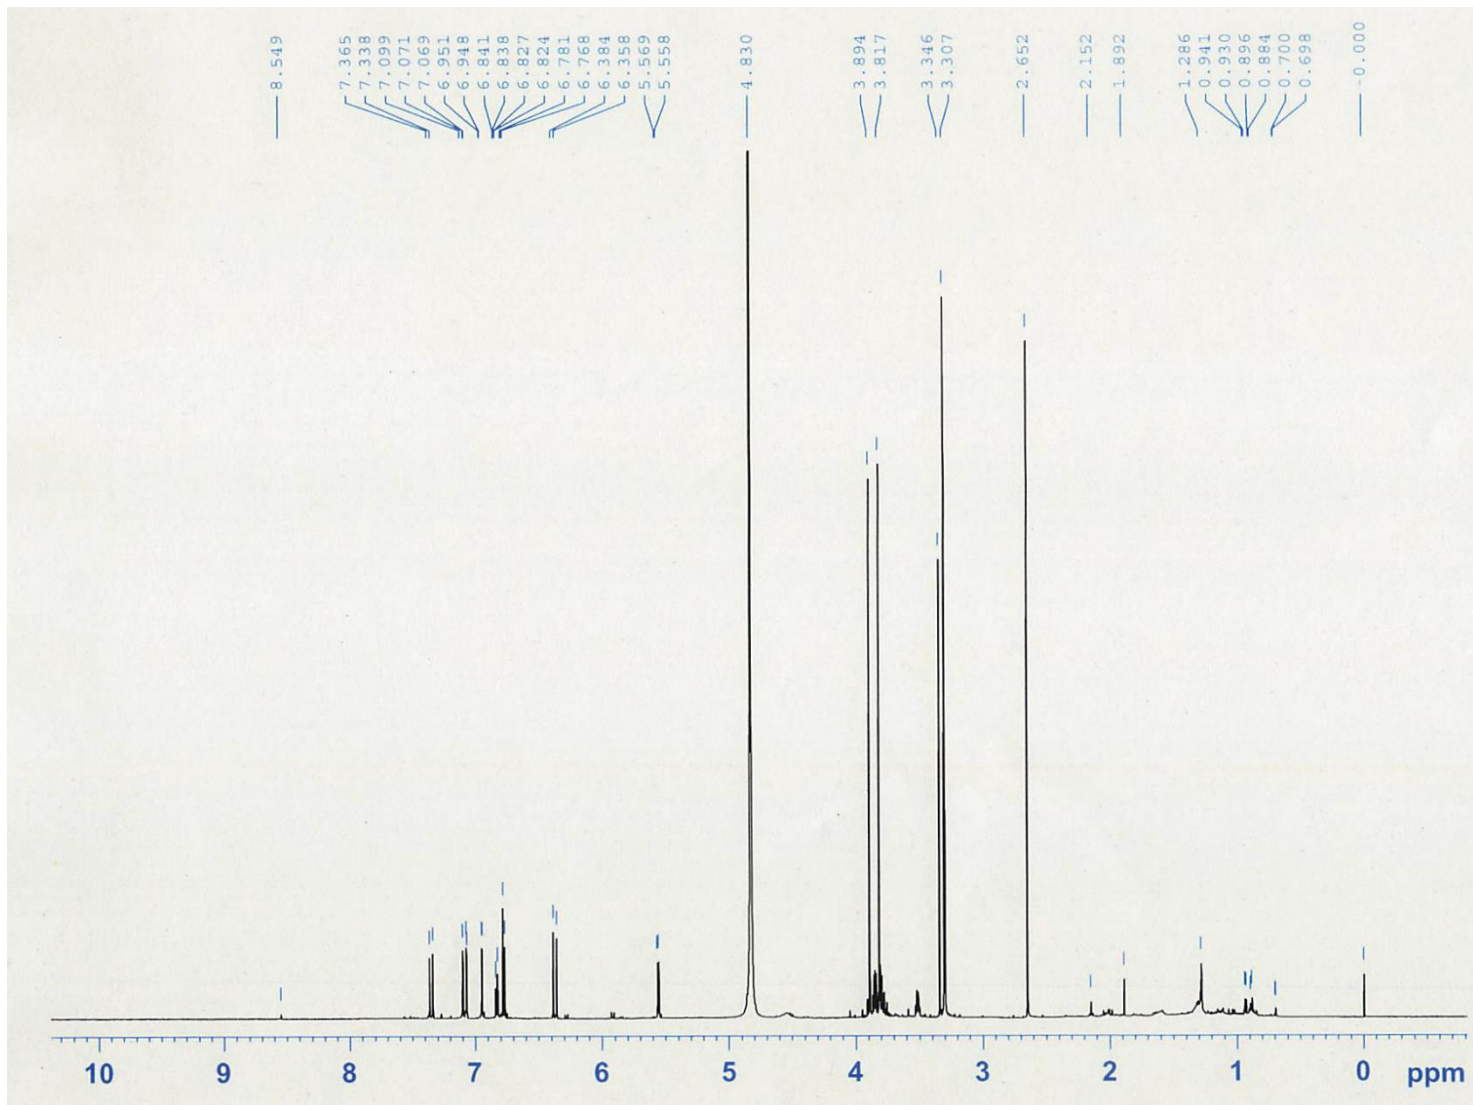

Fig. S 26;  $^{13}\text{C}$  NMR spectrum of compound 7

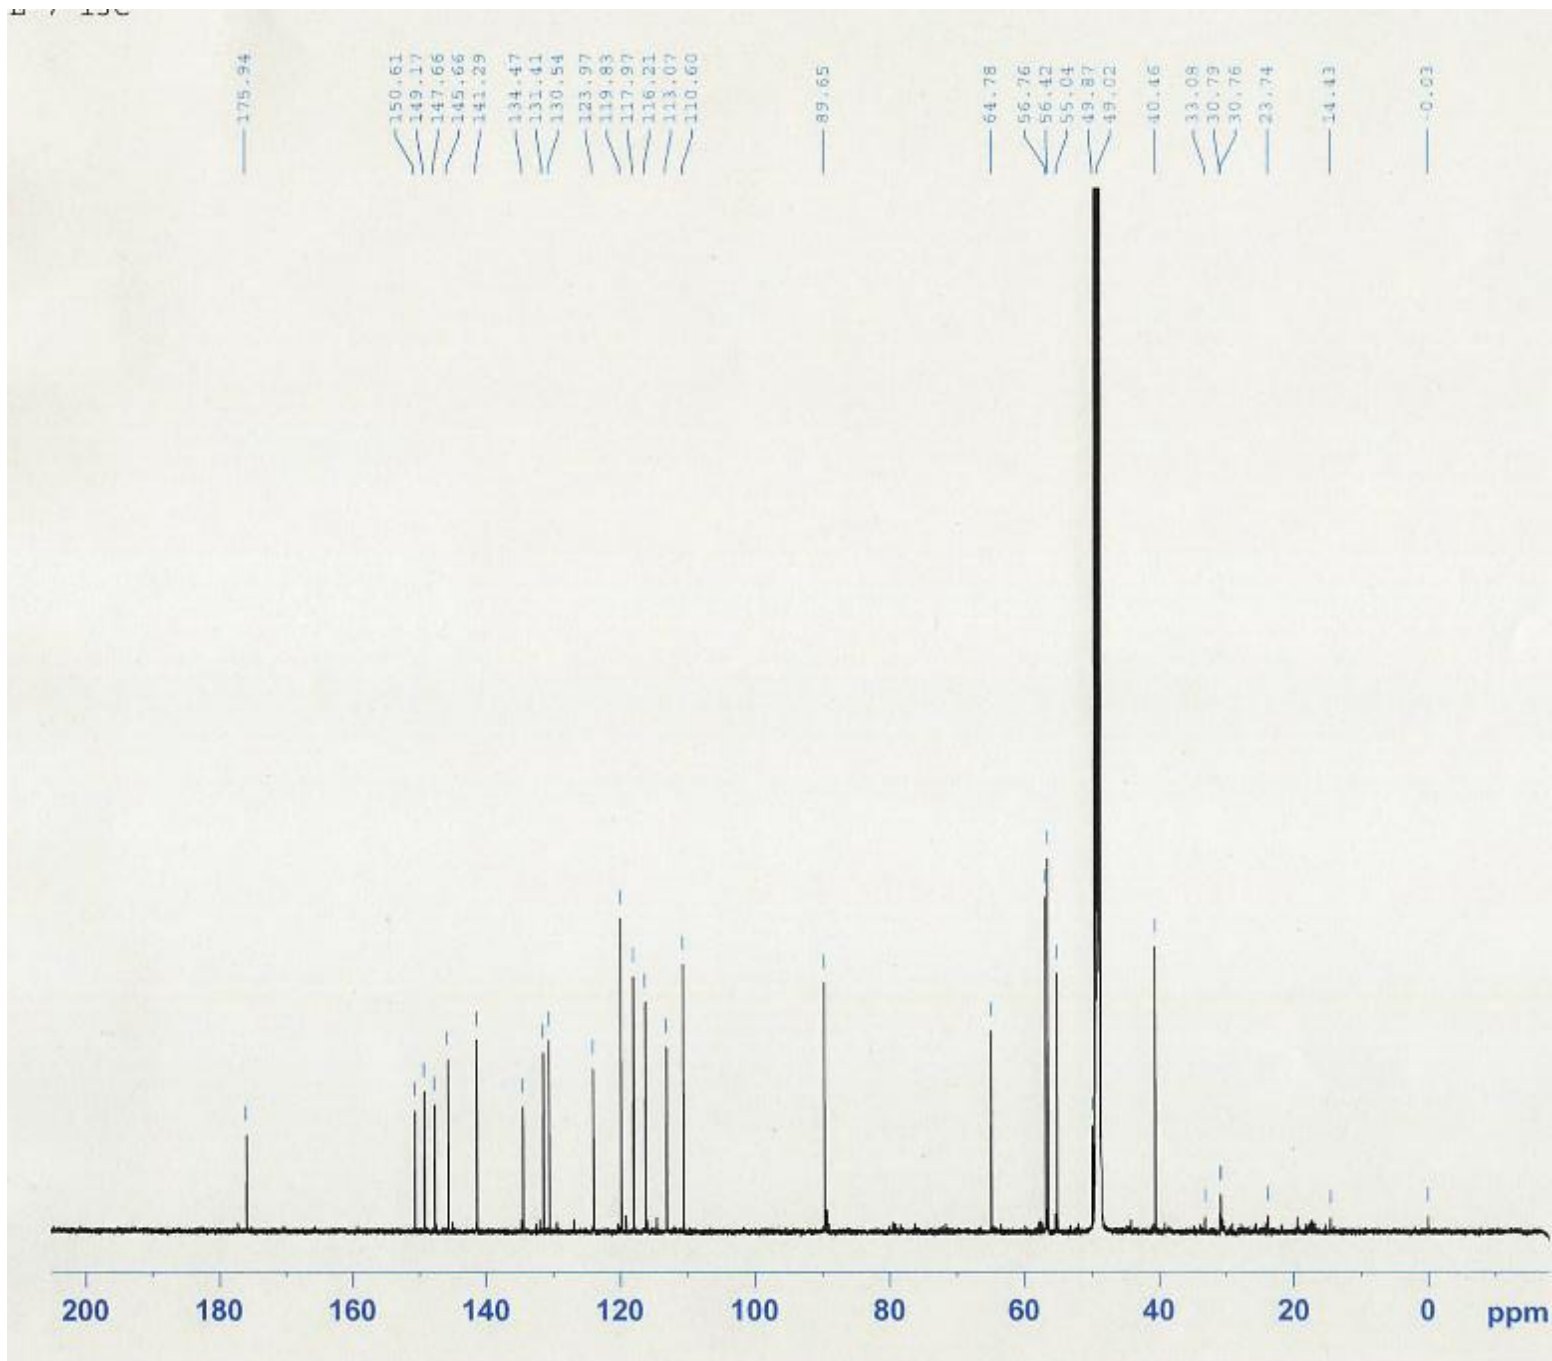

Fig. S 27; HSQC spectrum of compound 7

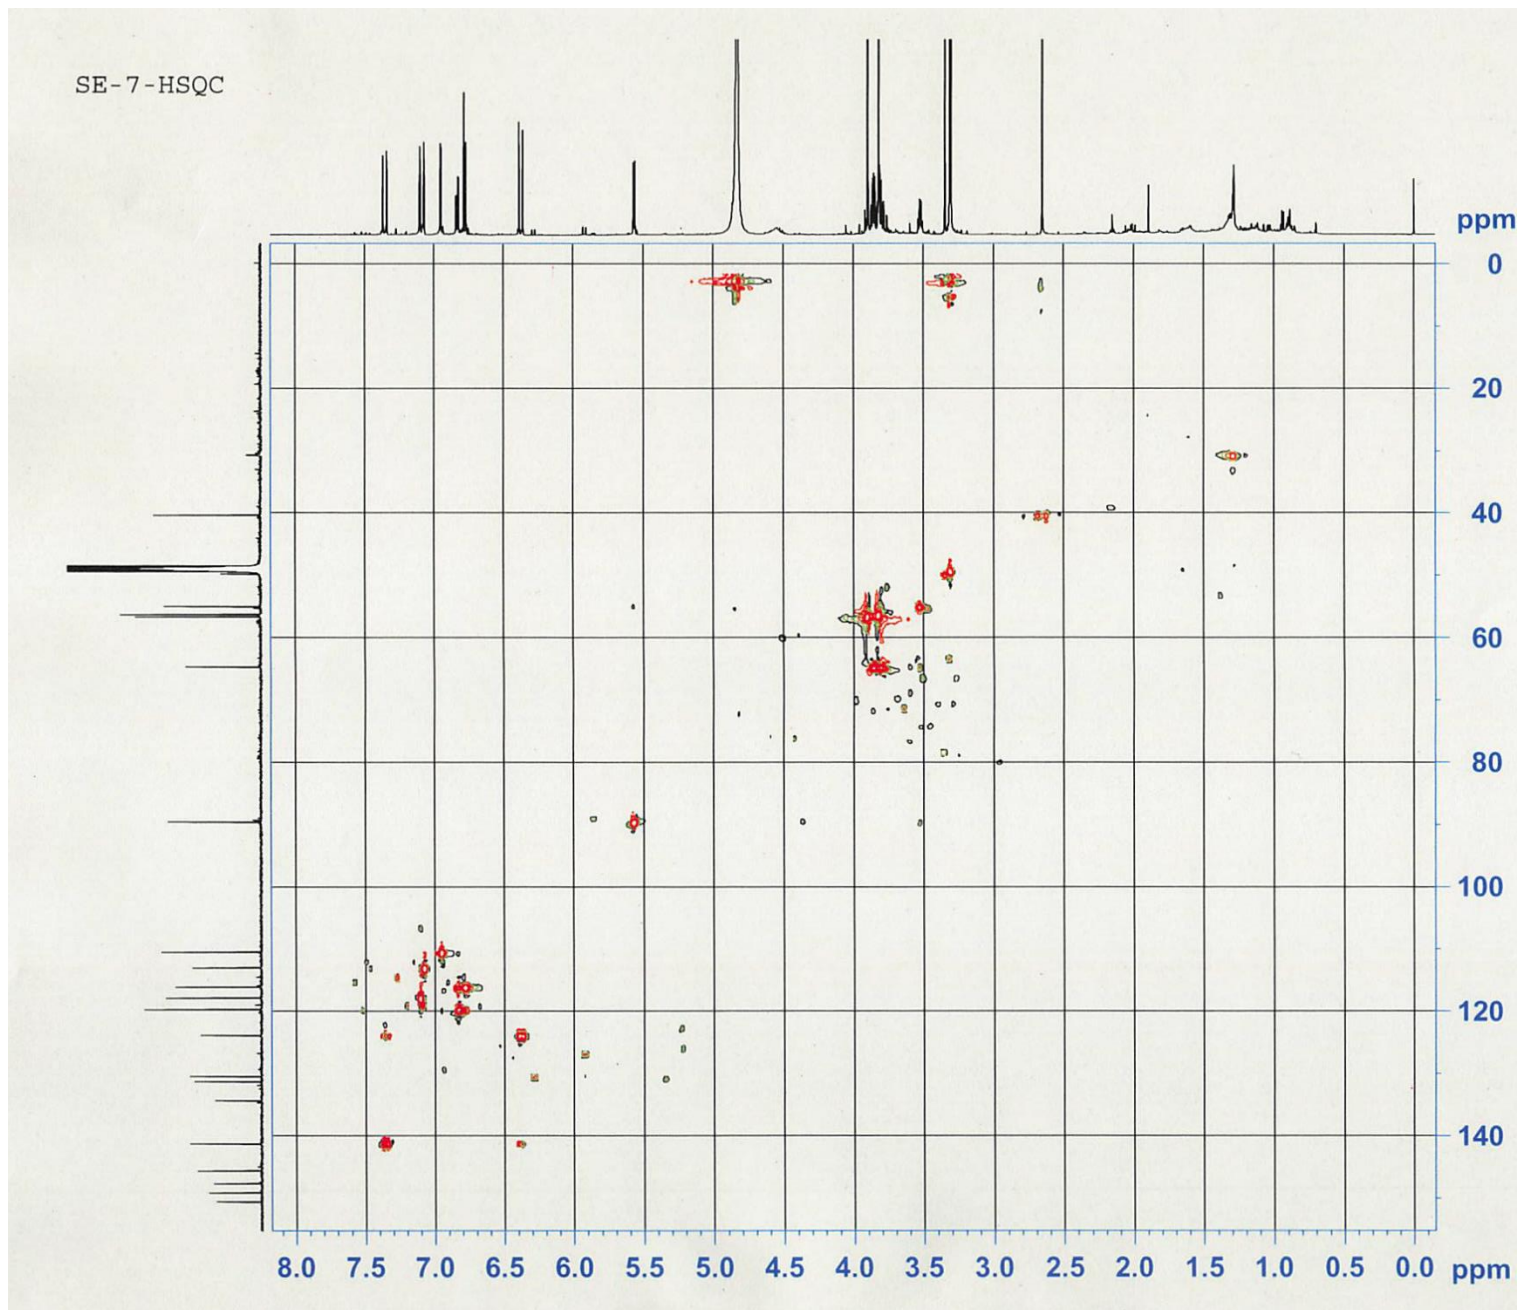

Fig. S 28; HMBC spectrum of compound 7

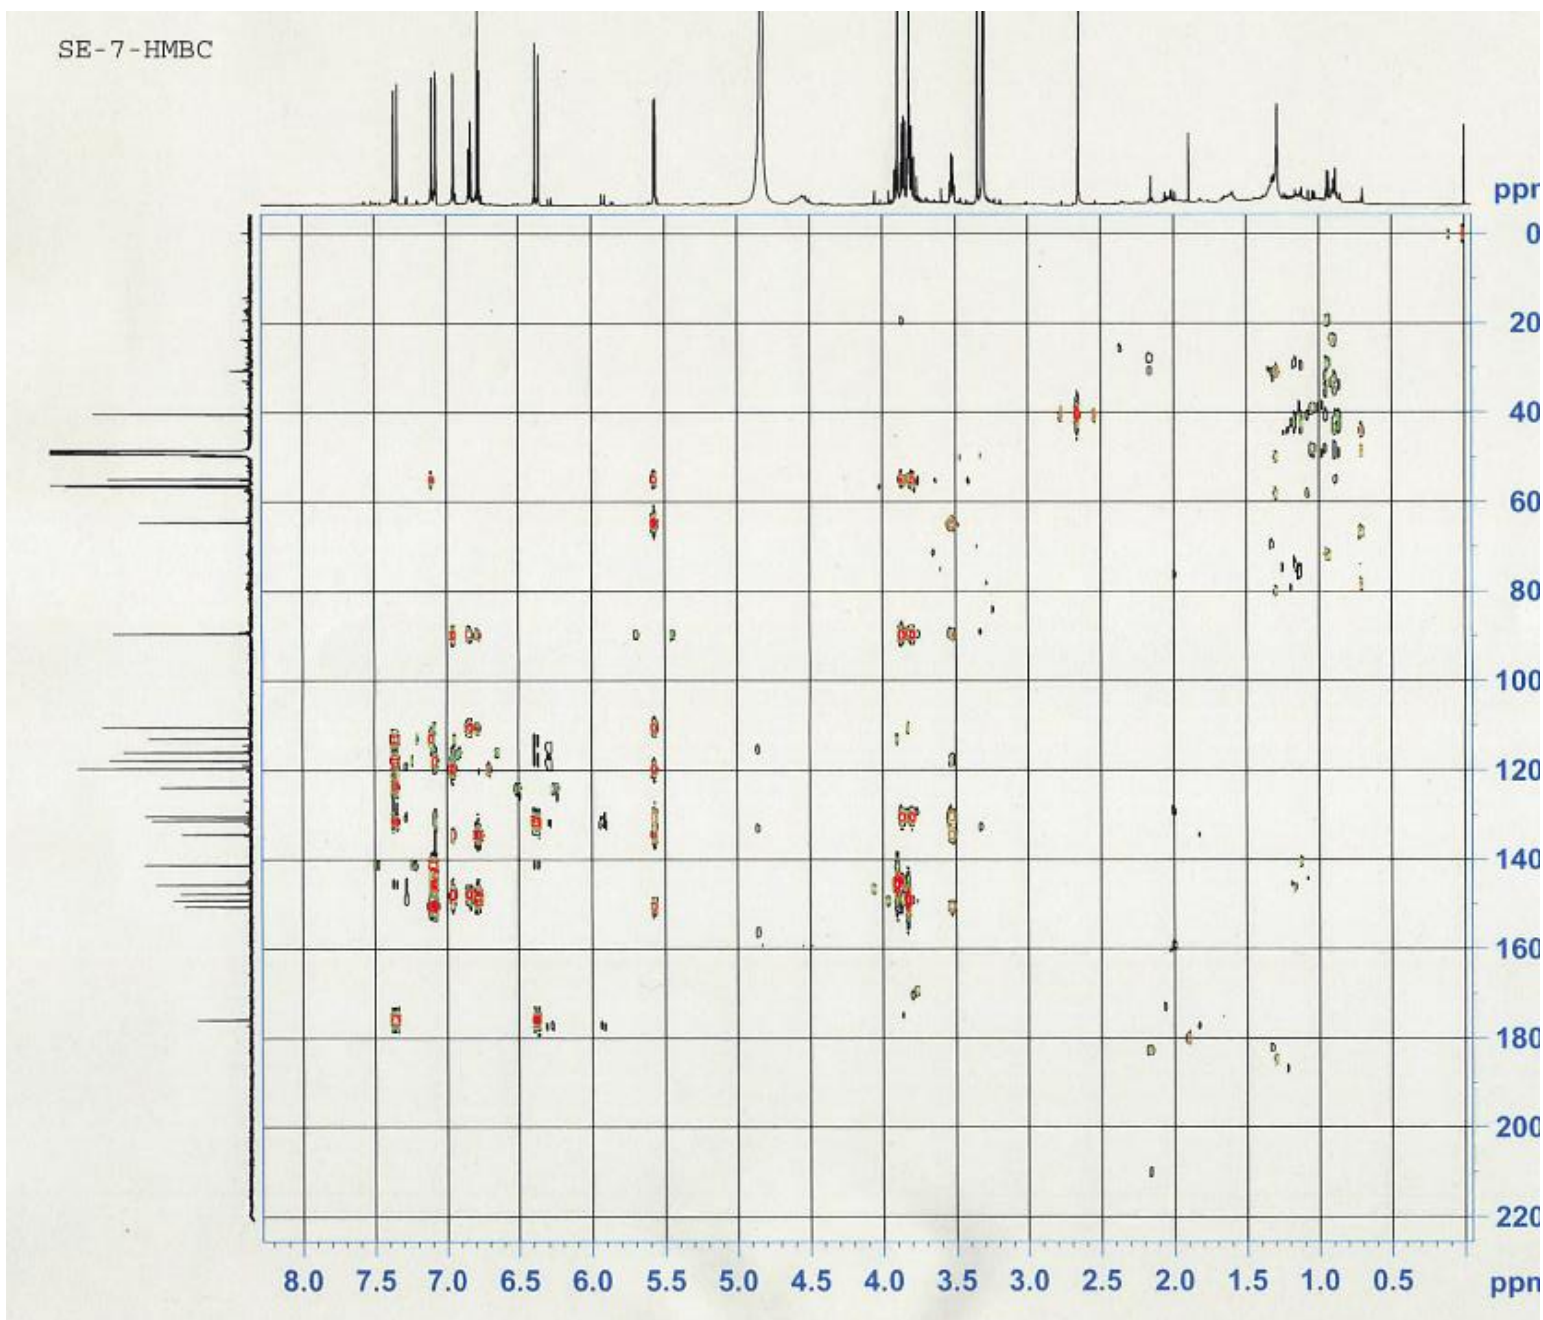

**Fig. S29. M Pro**

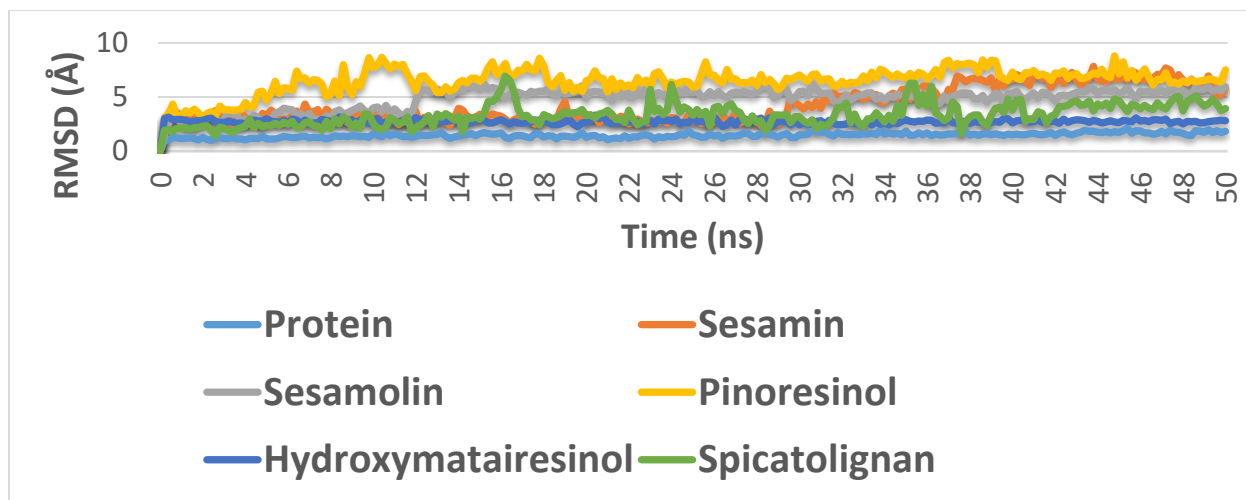

**Fig. S30. PLPRO**

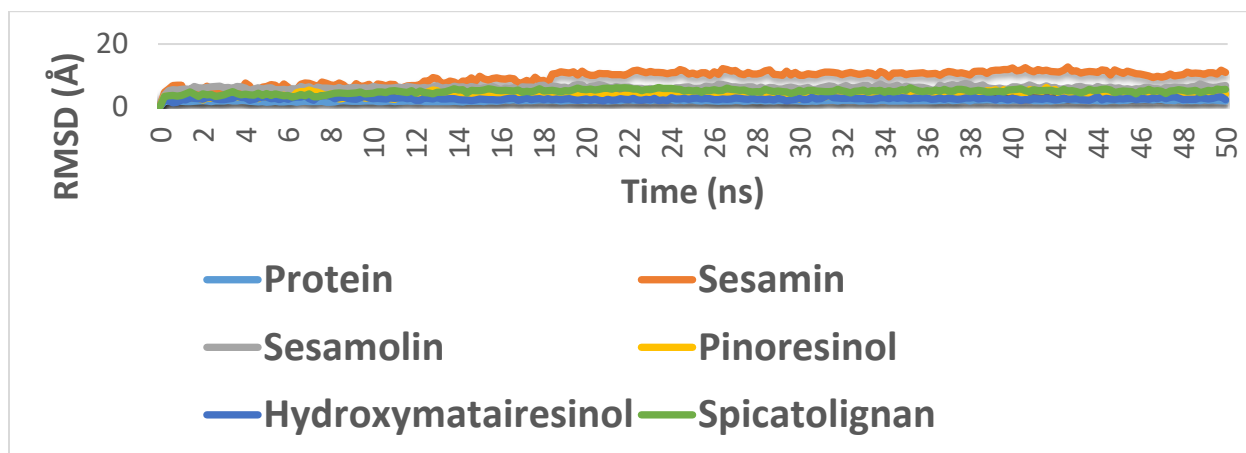

**Fig. S31. RDRP**

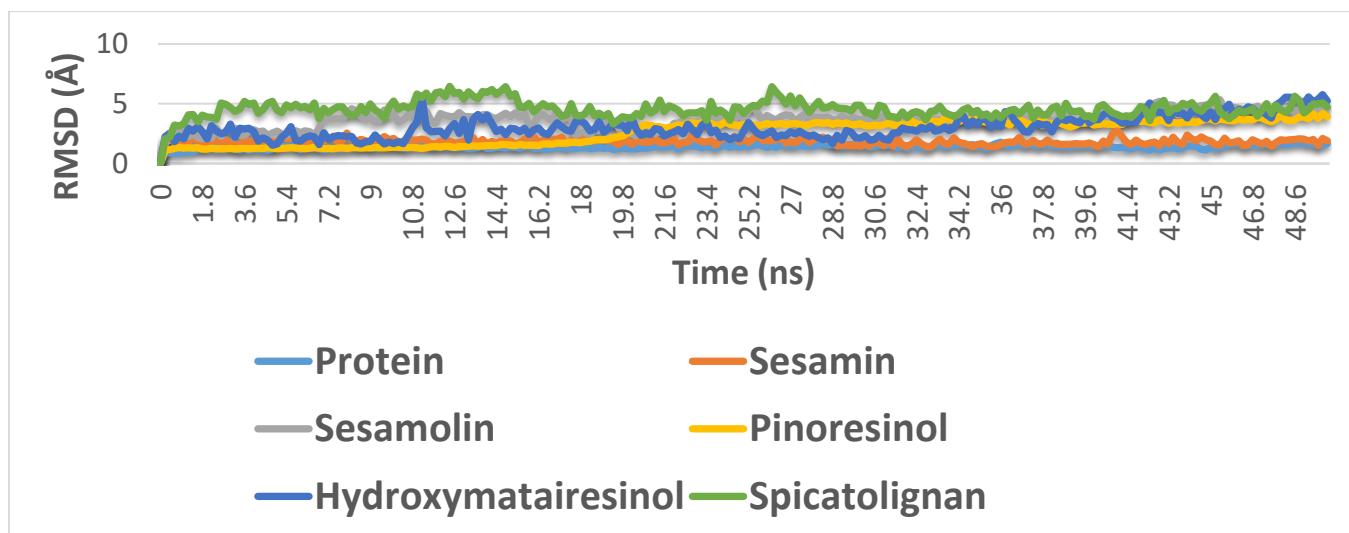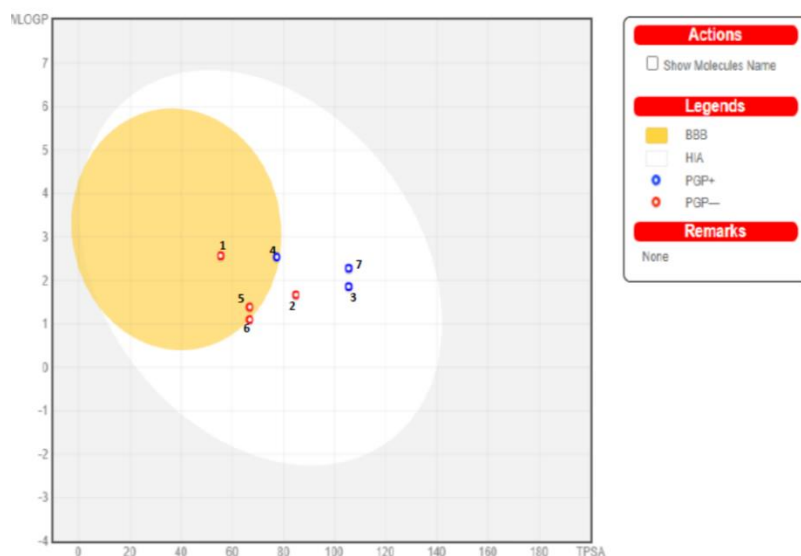

**Fig. S32** Boiled-egg diagram of the investigated compounds. BBB, passively permeate blood brain barrier; HIA, Human intestinal absorption; PGP+, compounds that effluated from central nervous system by the P-Glycoprotein; PGP-, compounds that is not binding to P-Glycoprotein.
